1 **Paper title: Chronic ethanol drinking in non-human primates induces inflammatory**  
2 **cathepsin gene expression in alveolar macrophages accompanied by functional**  
3 **defects**

4 Running title: Alveolar macrophages and chronic alcohol drinking in non-human primates

5 Sloan A. Lewis<sup>1,2</sup>, Brianna Doratt<sup>1,2</sup>, Suhas Sureshchandra<sup>1,2</sup>, Allen Jankeel<sup>1</sup>, Natali  
6 Newman<sup>3</sup>, Kathleen A. Grant<sup>3</sup>, Ilhem Messaoudi<sup>1, 2, 4, \*</sup>

7 <sup>1</sup> Department of Molecular Biology and Biochemistry, University of California, Irvine CA  
8 92697

9 <sup>2</sup> Institute for Immunology, University of California, Irvine CA 92697

10 <sup>3</sup> Oregon National Primate Research Center, Oregon Health and Science University,  
11 Beaverton, OR, USA

12 <sup>4</sup> Center for Virus Research, University of California, Irvine CA 92697

13 \*Corresponding Author:

14 Ilhem Messaoudi

15 Molecular Biology and Biochemistry

16 University of California Irvine

17 2400 Biological Sciences III

18 Irvine, CA 92697

19 Phone: 949-824-3078

20 Email: [imessaou@uci.edu](mailto:imessaou@uci.edu)

21  
22  
23  
24

25 **ABSTRACT**

26 Chronic alcohol drinking is associated with increased susceptibility to viral and bacterial  
27 respiratory pathogens. Investigating the effects of alcohol on the lung is challenging in humans  
28 because of the complexity of human drinking behavior and the challenge of obtaining samples. In  
29 this study, we utilize a rhesus macaque model of voluntary ethanol self-administration to study  
30 the effects of alcohol on the lung in a physiologically and genetically relevant model. We report a  
31 heightened activation and inflammatory state in alveolar macrophages (AM) obtained from  
32 ethanol drinking animals that is accompanied by increased chromatin accessibility in intergenic  
33 regions that regulate inflammatory genes and contain binding motifs for transcription factors AP-  
34 1, IRF8, and NFkB p-65. In line with these transcriptional and epigenetic changes at basal state,  
35 AM from ethanol drinking animals generate elevated inflammatory mediator responses to LPS  
36 and respiratory syncytial virus (RSV). Analysis using scRNA-Seq revealed heterogeneity in lung-  
37 resident macrophage and monocyte populations, including increased abundance of activated and  
38 cathepsin-expressing clusters and accelerated differentiation with ethanol. Finally, functional  
39 assays show increased mitochondrial content in AM from ethanol drinking animals, which is  
40 associated with observed increased ROS and decreased phagocytosis capacity. This  
41 comprehensive epigenomic, transcriptional and functional profiling of lung macrophages after  
42 ethanol drinking in macaques provides previously unidentified mechanisms of ethanol induced  
43 infection susceptibility in patients with alcohol use disorders.

44

45

46

47 **KEYWORDS**

48 Alcohol, inflammation, lung, macrophages, non-human primates, scRNA-Seq, ATAC-Seq

49

50

51

## 52 INTRODUCTION

53 Alcohol use is prevalent in the United States with over 50% of people 18 years or older  
54 reporting alcohol consumption with the previous 30 days (National Survey on Drug Use and  
55 Health 2019). Amongst these individuals, 25% report binge drinking and 6.3% report heavy  
56 drinking. Long term heavy drinking is associated with numerous adverse health outcomes,  
57 including increased incidence of cardiac disease (1, 2), certain types of cancer (3-6), liver cirrhosis  
58 (7), and sepsis (8), making it the third leading preventable cause of death in the United States (9).  
59 Of importance, chronic heavy alcohol drinking compromises lung health and immunity leading to  
60 increased susceptibility to both bacterial and viral pulmonary infections (10), notably respiratory  
61 syncytial virus (RSV), (11) community-acquired pneumonia (12-14), and tuberculosis (15, 16).  
62 Alcohol use is also a risk factor for acute respiratory distress syndrome (ARDS) (17, 18) and can  
63 increase the risk of admission to intensive care unit (ICU) in patients with pneumonia (10, 12, 17,  
64 19). While the mechanisms underlying increased vulnerability and severity of pulmonary  
65 infections with chronic alcohol consumption have yet to be fully elucidated, studies using rodent  
66 models as well as *in vitro* cell cultures have identified defects in the beating of the ciliated  
67 epithelium (20-22) as well as impaired epithelial barrier function (23, 24) as major risk factors.  
68 Moreover, these studies report significant defects in both the innate and adaptive branches of the  
69 immune system (10), especially within alveolar macrophages (AM), the first line of defense in the  
70 lung (25). Specifically, prolonged alcohol exposure alters the ability of AM to release cytokines  
71 and chemokines needed to recruit immune cells into the lung (26, 27) as well as their ability to  
72 clear both microbes and dying cells to reduce damage to tissue (28) potentially due to oxidative  
73 stress (29). The molecular basis for altered macrophage metabolism and function in the lung with  
74 alcohol is yet to be determined.

75 Lung-resident macrophages can be categorized into interstitial and alveolar with interstitial  
76 macrophages primarily residing within the tissue while alveolar macrophages are predominantly  
77 found within the lumen of the alveoli (30). Studies in mice have revealed that lung macrophages  
78 are derived from yolk sac and fetal liver as well as from bone marrow monocytes (30). It is believed  
79 that embryonically derived macrophage populations have a self-renewal capacity and are  
80 functionally distinct from the monocyte-derived macrophages populations, however, whether this  
81 is true in humans is still unanswered (30). Recent studies have uncovered enormous  
82 heterogeneity in lung macrophage populations, but many questions remain as to how  
83 environmental factors or inflammatory settings alter the functional capabilities of these cells to  
84 clear pathogens and repair tissue.

85           In this study, we use bronchoalveolar lavage (BAL) samples collected from rhesus  
86 macaques that voluntarily self-administered ethanol (EtOH) or an isocaloric solution for 12 months  
87 to examine the alcohol-induced epigenetic and transcriptomic changes that are coupled to altered  
88 macrophage function. We report a heightened activation state in AM obtained from EtOH drinking  
89 animals that was accompanied by increased chromatin accessibility in intergenic regions that  
90 regulate inflammatory genes and binding motifs for transcription factors AP-1, IRF8, and NFkB  
91 p-65. In line with these transcriptional and epigenetic changes at basal state, AM from EtOH  
92 drinking animals generated heightened inflammatory mediator responses to LPS and RSV. In  
93 contrast, expression of genes associated with tissue repair and antiviral type interferon responses  
94 were reduced with EtOH drinking. Additional analysis using scRNA-Seq revealed considerable  
95 heterogeneity in AM and monocyte populations, including increased abundance of activated and  
96 cathepsin-expressing cells. Finally, functional assays show reduced phagocytic capacity, but  
97 increased ROS production that may be mediated by increased mitochondrial content in AM from  
98 EtOH drinking animals. Our comprehensive epigenomic, transcriptional and functional profiling of  
99 lung macrophages after *in vivo* EtOH exposure in rhesus macaques provides novel mechanisms  
100 by which patients with alcohol use disorders have increased susceptibility to respiratory infections.

101

102

103 **RESULTS:**

104 ***Chronic EtOH exposure alters surface activation and chemokine receptor expression on***  
105 ***monocyte and macrophage populations in the lung***

106 Chronic heavy alcohol drinking has been shown cause activation and hyper-inflammation in  
107 monocytes in the blood (31) and macrophages in the spleen (32). The alveolar space in the lung  
108 is home to a large population of tissue-resident macrophages and infiltrating monocytes that are  
109 the first responders to respiratory infections. Given that patients with alcohol use disorders have  
110 increased susceptibility to respiratory pathogens, we used a multipronged approach to uncover  
111 the pleiotropic impact of chronic heavy drinking on the transcriptional, epigenetic, and functional  
112 landscape of the alveolar macrophages (AM). We collected bronchial alveolar lavage (BAL)  
113 samples from male and female rhesus macaques that either consumed EtOH or an isocaloric  
114 solution for 12 months (**Figure 1A and Supp. Table 1A**). We first determined the impact of  
115 chronic EtOH on the phenotype of AM by profiling cell surface markers using flow cytometry (n=6  
116 control, 8 EtOH). Based on previous studies (33-35), we identified alveolar macrophages (AM) as  
117 CD206+CD169+, interstitial macrophages (IM) as CD206+CD169-, and infiltrating monocytes as  
118 CD206-CD169-CD14+HLA-DR+ (**Figure 1B**). AM were further subdivided based on expression  
119 of CD163 (**Figure 1B**). No significant differences in frequencies of these major  
120 macrophage/monocyte populations were observed with EtOH exposure. (**Figure 1C**). However,  
121 examination of surface activation markers and chemokine receptors using flow cytometry showed  
122 a modest increase in CD40 and a modest decrease in CD11c expression on AM; modest increase  
123 in CCR2 expression on IM and infiltrating monocytes; and a modest increase in CD163  
124 expression on IM with chronic EtOH consumption ( $p \leq 0.1$ ) (**Figure 1D**). Similarly, chronic EtOH  
125 consumption led to heightened activation of the CD163<sup>lo</sup> AM subset as indicated by increased  
126 expression of CD14, HLA-DR, CD40, CD86 and CX3CR1 ( $p \leq 0.1$ ) (**Figure 1E**). To determine  
127 whether EtOH dose impacted the expression of surface markers, we performed linear regression  
128 analyses of median fluorescence intensities (MFI) with the 12-month average dose of ethanol (g  
129 EtOH/ kg body weight/ day). Average daily EtOH drinking positively correlated with CD40,  
130 CX3CR1 and CCR7 expression on AM (**Figure 1F**) and with CCR5 and CCR2 expression on  
131 monocytes and IMs (**Figure 1F**). CD11c expression negatively correlated with EtOH dose in  
132 monocytes and AMs while CD86 expression positively correlated with EtOH dose in the CD163<sup>lo</sup>  
133 AM population (**Figure 1F**). Therefore, while EtOH drinking does not result in major subset  
134 redistribution, it impacts the activation status of lung resident macrophages and chemokine  
135 receptors associated with lung trafficking on monocytes in a dose-dependent manner.

136

137 ***Chronic EtOH is associated with downregulation of genes involved in tissue maintenance***  
138 ***and wound healing in AM***

139 We have previously reported a disruption of transcriptional programs of both peripheral  
140 monocytes and splenic macrophages with chronic alcohol consumption (31, 36). Therefore, we  
141 next examined transcriptional rewiring of lung-resident alveolar macrophages, which harbor a  
142 significant proportion of embryonically derived, self-renewing tissue-resident cells (30). AM were  
143 purified from control and EtOH animals (n=3/group) and bulk RNA sequencing performed (**Figure**  
144 **1A**). EtOH exposure explained the most variability in baseline transcriptional profiles in AMs  
145 (**Figure 2A**). Differential analysis revealed 24 genes to be upregulated with EtOH (**Figure 2B**)  
146 including *CTSG*, *SNAP25*, and *HEBP2* which are all associated with granulocyte activation and  
147 degranulation (**Figure 2C**). EtOH consumption was also associated with 195 downregulated  
148 DEG, among which *CLEC1B*, which is associated with an anti-inflammatory macrophage  
149 phenotype, was the most significant (**Figure 2A**) (37). The downregulated DEG mapped  
150 significantly to response to wounding (*CLEC1B*, *NRP1*, *PTK2*, and *PRKACB*), cell morphogenesis  
151 (*MYO7A*, *PLCGG1*), and vasculature development (*HMG2*, *ACTA2*) pathways (**Figure 2D and**  
152 **2E**). These observations indicate that EtOH consumption skews AM away from tissue  
153 maintenance and repair and towards inflammatory responses.

154  
155 ***EtOH exposure results in opened promoter regions at CTSG and SNAP25 genes involved***  
156 ***in degranulation and inflammation in alveolar macrophages (AM)***

157 To assess whether baseline transcriptional changes in the AM could be due to epigenetic changes  
158 caused by EtOH exposure, we performed ATAC-Seq on purified AM from control and ETOH  
159 animals (n=3/group). Although the relative distribution of open promoter and distal regions was  
160 comparable between controls and EtOH AM (**Figure 3A**), several differentially accessible regions  
161 were identified within the promoter and distal intergenic regions (**Figure 3B**). The 70 genes  
162 associated with promoters that were more closed with EtOH enriched to gene ontology (GO)  
163 terms associated with barrier function such as endothelium development (*CLDN3*, *CLDN5*) and  
164 T-helper cell differentiation (*FOXP1*) (**Figure 3C**). The 25 genes associated with promoters that  
165 were more accessible with EtOH mapped to GO term regulation of hormone levels (*CTSG*,  
166 *SNAP25*, and *MYO3A*) (**Figure 3C, D**). Intriguingly, these 3 genes were also upregulated based  
167 on the bulk RNA-Seq analysis (**Figure 3D**).

168 Analysis of potential cis-regulatory mechanisms of regulation in the non-promoter regions was  
169 performed by first lifting the genomic regions from the macaque to human genomes followed by  
170 enrichment using the GREAT database. This analysis revealed no significant enrichment of the

171 regions that were less accessible with chronic EtOH; however, intergenic regions that were more  
172 accessible with chronic EtOH significantly enriched to respiratory system development (*CTGF*,  
173 *EGFR*, *TGFBR2*) and regulation of response to external stimulus (*C1QB*, *CD180*, *CXCR4*, *IL21*)  
174 (**Figure 3E**). Finally, we performed transcription factor (TF) binding motif analysis on the distal  
175 intergenic DAR, which showed higher likelihood of binding sites for TF that play a critical role in  
176 inflammation, notably AP-1, IRF8, and NFKB p-65 with chronic EtOH (**Figure 3F**). These  
177 observations indicate significant remodeling of the epigenetic and transcriptional landscape of AM  
178 towards a heightened inflammatory state with chronic EtOH drinking.

179

180 ***AM functional response to pathogens is characterized by non-specific inflammatory***  
181 ***mediator production, but compromised interferon transcriptional response with chronic***  
182 ***EtOH***

183 Previous studies have reported an exaggerated inflammatory response by myeloid cells to LPS  
184 (31, 32, 36, 38). Thus, FACS purified AM were stimulated with LPS (n=6/group), and immune  
185 mediator production was determined by Luminex (**Supp. Figure 1A and Supp. Table 2**). As  
186 described for peripheral blood and splenic macrophages, AM from EtOH drinking animals  
187 mounted a hyper-inflammatory response as indicated by heightened production of cytokines (IL-  
188 6, TNF $\alpha$ ) and chemokines (CXCL8, CXCL10, CCL2, CCL4) compared to control AM (**Supp.**  
189 **Figure 1A**). We next examined responses of AM to a respiratory pathogen. To that end, FACS  
190 purified AM were stimulated with respiratory syncytial virus (RSV) *ex vivo* (n=8/group) and antiviral  
191 responses were determined using RNA-Seq and Luminex. We found broadly that in response to  
192 RSV stimulation, AM produced a majority growth factors (e.g. BDNF, VEGF, PDGF, and FGF), a  
193 few chemokines (CCL5 and CXCL10) and canonical inflammatory marker IL-6 (**Figure 4A**).  
194 Despite comparable viral loads (**Supp. Figure 1B**), AM from EtOH exposed animals also  
195 produced significantly increased amounts of additional inflammatory mediators (IL-1 $\beta$ , IL-12, IL-  
196 15, IFN $\beta$ ) as well as other cytokines and growth factors (GM-CSF, C-CSF, IL-7) relative to their  
197 unstimulated condition (**Figure 4A**). AM from EtOH exposed animals also produced significantly  
198 higher levels of IL-6, IL-12 and TGF $\alpha$  relative to their control counterparts (**Figure 4B**). Moreover,  
199 significant positive correlations between IL-6, IL-12, and CCL5 concentration and EtOH dose was  
200 observed (**Figure 4C**).

201 In contrast to the immune mediator production profile, AM from the EtOH group had a smaller  
202 transcriptional response and fewer DEG (516 DEG in control vs. 340 DEG in EtOH group) than  
203 controls (**Figure 4D**). DEG upregulated in the control group enriched to in anti-viral signaling and  
204 regulation of cytokine production processes (**Figure 4E**), whereas those upregulated in the EtOH

205 group enriched to cell cycle and response to drug processes (**Figure 4E and Supp. Figure 1C**).  
206 Interestingly, gene signatures of cellular response to type I (IFN $\beta$ ) and type II (IFN $\gamma$ ) interferons  
207 (*CCL18*, *IFI16*, *TLR2*, and *TLR3*) (**Figure 4F**) and immune activation (*CD80*, *CD86*, and *CCL2*)  
208 were upregulated only in control AM (**Supp. Figure 1D**). A significant number (297) of  
209 downregulated DEG from the control AM mapped to regulated exocytosis, cell morphogenesis,  
210 and response to wounding pathways (**Supp. Figure 1E**) such as *SIGLEC10*, *PTPN6*, and *SDC1*  
211 (**Supp. Figure 1F**). To determine regulatory mechanisms for the differences in transcriptional  
212 response to RSV, we used the ChEA3 database (39) to predict transcription factor (TF) regulation.  
213 This analysis showed that genes upregulated only in control AM with RSV were regulated by  
214 phagocytosis and viral response associated TFs PLSCR1, SP100, and IRF7, while genes  
215 upregulated in EtOH AM were regulated by inflammatory TF HMGA2 (**Supp. Figure 1G**). These  
216 observations indicate that chronic EtOH drinking results in non-specific inflammation coupled with  
217 dysfunctional anti-microbial responses in AM.

#### 218 219 ***scRNA-Seq profiling reveals significant changes in alveolar macrophage (AM) cell states*** 220 ***with chronic EtOH***

221 To investigate the impact of chronic EtOH on AM cell states, we performed scRNA-Seq on CD14+  
222 purified cells from BAL samples obtained from control and EtOH animals (n=3/group) (**Supp.**  
223 **Figure 2A**). Uniform manifold projection (UMAP) of clustering analysis revealed 10 clusters  
224 (**Figure 5A,B**). To identify infiltrating blood-derived monocytes, we integrated single cell profiles  
225 of BAL macrophages with those of blood monocytes from the same animals (31) (**Supp. Figure**  
226 **2B**). We projected cells that clustered with the blood monocytes back onto the UMAP, which  
227 revealed that cluster 4 was the major monocyte subset with some monocyte infiltration in cluster  
228 7 (**Supp. Figure 2C**). Expression of major macrophage/monocyte markers grouped cells into  
229 tissue resident macrophages (TRM 0, 1, 2, 8; expressing high levels of *FABP4*, *CD163*, and  
230 *MRC1*, *SIGLEC1*), monocytes (4; expressing high levels of *CD14*, *IL1B*, and *CCL2*), and  
231 monocyte-derived macrophages (MDM 3, 5, 6, 7, 9; intermediate expression of TRM and  
232 monocyte markers) (**Supp. Figure 2D**). TRM could be further divided into four clusters based on  
233 expression of *CYBB* (cluster 0), *S100A10* (cluster 1), *CD48* (cluster 2), and *MKI67* (cluster 8,  
234 proliferating) (**Figure 5C and Supp. Table 3**). MDM were divided into five clusters based on  
235 expression of *CFD* (cluster 3), *CTSD* (cluster 5, cathepsin high), *MSMO1*(cluster 6), *ISG15*  
236 (cluster 7 viral, monocyte infiltration), and *CXCL1* (cluster 9, activated) (**Figure 5C**). Cells from  
237 EtOH animals almost exclusively made up the activated MDM cluster 9 and were more enriched



238 in TRM cluster 1 and MDM cluster 5 (cathepsin high) (**Figure 5D**). On the other hand, cells from  
239 controls were more abundant in the MDM cluster 3 and blood monocyte cluster 4 (**Figure 5D**).  
240 Next, we performed trajectory analysis using Slingshot and identified 4 unique trajectory paths  
241 starting from blood monocytes the culminated into clusters 7, 2, 5, and 6 (**Figure 5E**). Cells from  
242 control animals were more abundant at the start of the trajectory while cells from EtOH animals  
243 were more abundant at the end suggesting accelerated differentiation of monocytes with chronic  
244 EtOH consumption (**Figure 5F**). All trajectories were characterized by increased expression of  
245 *FABP4* and *ITGA6* and decreased expression of *CCL17* and *TMEM176B* indicative of the  
246 transition from blood to tissue resident cells (**Figure 5G**). Interestingly, trajectory 3 had decreased  
247 expression of *FABP4* and *ITGA6* but increased expression of *CTSD* and *CHIT1* at the end of the  
248 pseudotime suggesting a heightened inflammatory state (**Figure 5G,H**). Additional differential  
249 analyses on the major TRM subsets (0, 1, 2) showed increased expression of inflammatory *CCL2*  
250 but decreased expression of *FABP4* with EtOH in these clusters (**Supp. Figure 2E**). We conclude  
251 that EtOH induces subset redistribution within the AM, accelerating the differentiation from  
252 monocytes to macrophage subsets with high expression of inflammatory cathepsins.

253

#### 254 ***EtOH-induced increase in mitochondria skews alveolar macrophages towards hypoxia and*** 255 ***ROS production and away from phagocytic and antigen presentation processes***

256 To assess the functional implications of EtOH-induced changes in cell states, we carried out  
257 functional enrichment of the gene markers of the clusters that were more abundant in EtOH  
258 animals (TRM cluster 1, MDM cluster 5, MDM cluster 9). We identified that all three clusters  
259 mapped significantly to neutrophil degranulation, myeloid leukocyte activation, and regulated  
260 exocytosis (**Figure 6A**). All marker genes enriched to GO terms associated with myeloid cell  
261 activation, response to drug, and exocytosis (**Figure 6A**). This enrichment was most evident for  
262 MDM cluster 9 marker genes (**Figure 6A**). Additionally, TRM1 and MDM9 cluster gene markers  
263 mapped to response to hypoxia and positive regulation of cell migration (**Figure 6A**). To follow up  
264 on these observations, we performed module scoring. We found phagocytosis, antigen  
265 presentation, and cell adhesion to be downregulated with EtOH whereas HIF1A signaling,  
266 chemokine signaling, and cytokine signaling were upregulated (**Figure 6B,C and Supp. Table**  
267 **4**).

268 To further define the impact of these transcriptional changes, we incubated BAL cells with *S.*  
269 *aureus* labeled pHrodo and measured phagocytic capacity of AM using flow cytometry. AM from  
270 EtOH exposed animals exhibited a reduced capacity for phagocytosing bacteria compared to  
271 controls (**Figure 6D**). Additionally, cytosolic ROS production was increased in AM and IM after

272 LPS stimulation with EtOH indicating a heightened oxidative state (**Figure 6E and Supp. Figure**  
273 **2F**). Finally, as ROS production and activation in macrophages have been linked to mitochondrial  
274 function (40), we profiled the intracellular mitochondria content in AM and IM and identified  
275 significantly increased mitochondria with EtOH in AM (**Figure 6F and Supp. Figure 2G**). Given  
276 heightened inflammatory responses in the AM, we sought to determine whether alcohol drinking  
277 affected the M1/M2 polarization of the lung myeloid cells. We performed module scoring of M1  
278 and M2 genes (41) and identified that EtOH significantly skews the monocytes and macrophages  
279 towards an M1-like and away from an M2-like phenotype (**Supp. Figure 2H**). Altogether, these  
280 data indicate that increased levels of mitochondria in AM with EtOH may be skewing the AM  
281 towards hypoxia and ROS production and away from phagocytic functional processes.  
282  
283

284 **DISCUSSION:**

285 Tissue resident macrophage and infiltrating monocyte populations make up a majority of  
286 the immune cells in the alveolar space where they interact with insults to the respiratory tract  
287 including toxins, pathogens and allergens (42). They are responsible for mounting an  
288 inflammatory immune response when necessary and moreover remodeling and repairing the  
289 tissue. Under homeostatic conditions, a tight balance between inflammatory and anti-  
290 inflammatory responses is maintained. This delicate balance can be dysregulated by  
291 environmental factors including pollutants, smoking, and alcohol drinking (43). Indeed, alcohol  
292 consumption results in increased susceptibility to respiratory diseases, but the mechanism  
293 underlying this increased vulnerability are not completely understood. Therefore, in this study, we  
294 carried out a comprehensive examination of the impact of chronic heavy alcohol consumption on  
295 the transcriptome, epigenome, and function of AM obtained from a rhesus model of voluntary  
296 ethanol self-administration. Specifically, bronchoalveolar lavages (BAL) were obtained after 12  
297 months of drinking. This process is known to capture AM and infiltrating monocyte populations  
298 but not interstitial macrophages (IM) that reside within the lung tissue. However, our flow  
299 cytometry data indicate the presence of a small fraction of IM (CD206+CD169) in the BAL  
300 samples in addition to a large AM population. Broadly, our findings show that ethanol drinking  
301 leads to a heightened activation and inflammatory state in alveolar macrophages accompanied  
302 by reduced functional abilities.

303 A prominent observation of this study was increased expression of cathepsin G (*CTSG*)  
304 in AM that was accompanied by increased chromatin accessibility at *CTSG* promoter with chronic  
305 EtOH drinking. Furthermore, scRNA-Seq analysis revealed the presence of a cluster of monocyte  
306 derived macrophages dominated by cells from the EtOH group with heightened expression of  
307 cathepsins *CTSD*, *CTSG*, and *CTSL*. Cathepsins are proteases that are active in low pH  
308 lysosomes and have versatile functions in innate immunity, activation, tissue degradation (44).  
309 Dysregulated expression of cathepsins has been linked to diseases including arthritis, muscular  
310 dystrophy, and tuberculosis (44). The significance of increased cathepsin expression by ethanol  
311 in AM needs to be further studied to determine its importance in AM function and lung immunity.

312 It has been previously reported that AM from patients with alcohol use disorders have  
313 elevated inflammatory mediator expression (45, 46). To complement this, we identified chronic  
314 EtOH drinking in macaques resulted in increased activation surface marker expression on AM as  
315 indicated by significantly increased CD40 on CD163<sup>lo</sup> AM. As CD163 is associated with an M2  
316 or resolving macrophage phenotype (47), this indicates skewing towards a more inflammatory  
317 macrophage population. We additionally noted positive correlations of chemokine receptors

318 CCR7, and CX3CR1 with EtOH dose in the AM populations. CCR7 has been associated with an  
319 M1-like phenotype in AM (48), and CX3CR1 has been implicated in TNF $\alpha$  and IL-6 production in  
320 tissue resident mononuclear phagocytes in the lungs of smokers (49) as well as in profibrotic  
321 macrophage subsets (50). This skewing towards M1-like phenotype was confirmed by scRNA-  
322 Seq data where the module score of genes associated with an M1-like phenotype was higher  
323 while that of M2- like phenotype was lower in the ethanol group. Additionally, transcription factor  
324 motif analysis revealed enrichment of binding sites for pro-inflammatory TF AP-1, IRF8, and NF $\kappa$ B  
325 with ethanol. These data are in line with our previously reported changes in splenic macrophages  
326 and circulating monocytes indicating broad epigenetic rewiring by *in vivo* chronic drinking (31, 32).  
327 Collectively, these cell surface and epigenetic alterations at baseline state in AM from ethanol  
328 drinking macaques could lead to heightened inflammation in the lung environment, which could  
329 further lead to tissue damage and risk of infection.

330 Previous studies have identified altered production of cytokines and chemokines as well  
331 as reduced phagocytic ability in AM with chronic drinking (26, 43). We found AM from the ethanol  
332 group generated a hyper-inflammatory cytokine and chemokine response to LPS. This fits well  
333 with our earlier studies on splenic macrophage and blood monocyte responses to LPS (31, 32),  
334 as well as other studies on long-term ethanol exposure and myeloid cells (38). In response to  
335 respiratory syncytial virus (RSV), AM produced significantly higher levels of IL-6, IL-12, and TGF $\alpha$   
336 than controls. Increased production of IL-6 in response to RSV could indicate broad hyper-  
337 inflammation. However, as IL-12 and TGF $\alpha$  levels are not increased in control AM after RSV  
338 stimulation, we believe the production of these with alcohol to be indicative of a non-specific and  
339 improper response. These observations are in line with increased susceptibility to RSV in  
340 individuals with alcohol use disorder (10, 11). To further analyze this response to RSV, we profiled  
341 the transcriptional profiles of the AM after infection and found, interestingly, a reduced  
342 transcriptional response. Moreover, DEG detected only in the control AM mapped to response to  
343 interferon pathways, indicating potential disruptions in antiviral pathway responses with chronic  
344 ethanol consumption.

345 Another critical function of AM is resolution of inflammation and tissue repair to avoid  
346 complicating conditions like acute respiratory distress syndrome (ARDS) (51). It has been  
347 observed that patients with alcohol use disorders have higher risk of developing ARDS (10, 18)  
348 and have weakened wound healing capacities (52). RNA-Seq of AM revealed decreased  
349 expression of genes mapping to wound healing processes, such as *CLEC1B*, in ethanol AM.  
350 Moreover, reduced chromatin accessibility was noted in promoters that regulate genes important  
351 for endothelium development and cell junction assembly with ethanol.

352           The scRNA-Seq revealed significant heterogeneity within tissue resident and monocyte  
353 derived macrophage populations. Recent studies on human lung macrophages have also shown  
354 significant macrophage diversity with disease states (30). Clusters that were abundant with  
355 ethanol consumption exhibited a transcriptional profile consistent with heightened activation and  
356 inflammation. Trajectory analysis further showed an accelerated differentiation of monocytes to  
357 macrophages with ethanol. Additional studies are needed to confirm determine whether these  
358 clusters represent independent lineages or different activation states associated with ethanol  
359 drinking Activation and differentiation in the heterogeneous macrophage populations are  
360 controlled by complex epigenetic mechanisms (53). It is possible that the heightened activation  
361 state as well as differentiation trajectory with ethanol can be attributed to a process akin to innate  
362 training where environmental factors lead to epigenetic changes that have long-lasting functional  
363 consequences (54).

364           Functionally, we report reduced phagocytosis of *S. aureus* by AM from the ethanol AM.  
365 Reduction in phagocytosis with long term and acute ethanol exposure has been previously  
366 observed in cell culture and rodent models (43, 55). It has been shown in culture that one  
367 mechanism of impaired phagocytic function of AM with ethanol is oxidative stress induced by  
368 increased NADPH oxidase (56-58). While studies have reported link between ethanol and its  
369 metabolites and changes in global methylation state, histone modifications, and ROS production,  
370 studies in *in vivo* settings have been limited (59). Data presented in this study show increased  
371 levels of intracellular reactive oxygen species (ROS) in AM with ethanol. Ethanol metabolism is a  
372 cause of oxidative stress and is directly involved in the production of ROS (60). As ROS serve as  
373 inflammasome activating signals and induce inflammation (61), this could contribute to increased  
374 production of cytokines and chemokines in response to stimulation. Since the mitochondrial  
375 respiratory chain complex I is one of the major contributors of cellular ROS (62), we measured  
376 mitochondrial content in AM and found increased mitochondria with ethanol. Future studies would  
377 be needed to determine the bioenergetics of these mitochondria and whether they are contributing  
378 directly to increased ROS levels and further inflammation in AM (63).

379           This study provides a comprehensive examination of AM in the context of chronic alcohol  
380 drinking in macaques. Our findings indicate increased baseline activation and inflammation  
381 signatures epigenetically and transcriptionally in AM that could contribute to increased non-  
382 specific inflammatory response to pathogens and compromised phagocytic ability. Potential new  
383 targets identified here include increased mitochondrial content, epigenetic alterations, and  
384 increased cathepsins in AM with ethanol drinking. These altered AM states could contribute to  
385 the increased susceptibility of patients with alcohol use disorders to respiratory infections.

## 386 **METHODS AND MATERIALS**

### 387 Animal studies and sample collection:

388 These studies used blood and bronchoalveolar lavage (BAL) samples from 9 female and 8 male  
389 rhesus macaques (average age 5.68 yrs), with 7 animals serving as controls and 10 classified as  
390 chronic heavy drinkers based on over 12 months of daily ethanol self-administration. These  
391 samples were obtained through the Monkey Alcohol Tissue Research Resource  
392 (<https://gleek.ecs.baylor.edu/>; Cohorts 6 and 7a). Details about this non-human primate model of  
393 voluntary ethanol self-administration have been described (64-66). These cohorts of animals were  
394 described in three previous studies of innate immune system response to alcohol (31, 32, 36).  
395 BAL cells were obtained after 12 months of open access (22 hr/day alcohol availability) and  
396 centrifuged, pelleted and cryopreserved until they could be analyzed as a batch. The average  
397 daily ethanol intake for each animal is outlined in **Supp. Table 1**.

398

### 399 Flow cytometry analysis:

400  $1-2 \times 10^6$  BAL cells were stained with the following surface antibodies (2 panels) against: CD206  
401 (BD, 19.2), CD169 (Biolegend, 7-239), HLA-DR (Biolegend, L243), CD14 (Biolegend, M5E2),  
402 CD11c (Biolegend, 3.9), CD40 (Biolegend, 5C3), CD163 (Biolegend, GHI/61), CD86 (Biolegend,  
403 IT2.2), CX3CR1 (Biolegend, 2A9-1), CCR7 (Biolegend, GO43H7), and CCR5 (Biolegend,  
404 J418F1). Samples were acquired with an Attune NxT Flow Cytometer (ThermoFisher Scientific,  
405 Waltham, MA) and analyzed using FlowJo software (Ashland, OR).

406

### 407 Monocyte/Macrophage Stimulation Assays:

408  $6.5 \times 10^4$  FACS sorted CD206+ cells from the BAL were cultured in RPMI supplemented with 10%  
409 FBS with or without 100 ng/mL LPS or respiratory syncytial virus (RSV) at an MOI of 5 for 16  
410 hours, in 96-well tissue culture plates at 37C in a 5% CO<sub>2</sub> environment. Plates were spun down:  
411 supernatants were used to measure production of immune mediators and cell pellets were  
412 resuspended in Qiazol (Qiagen, Valencia CA) for RNA extraction. Both cells and supernatants  
413 were stored at -80C until they could be processed as a batch.

414

### 415 Luminex Assay:

416 Supernatants from AM stimulated with LPS or RSV were measured the ProcartaPlex 31-plex  
417 panel measuring levels of cytokines (IFN $\alpha$ , IFN $\beta$ , IL-1 $\beta$ , IL-10, IL-12p70, IL-15, IL-17A, IL-1RA,  
418 IL-2, IL-4, IL-5, IL-6, IL-7, MIF, and TNF $\alpha$ ), chemokines (BLC(CXCL13), Eotaxin (CCL11), I-  
419 TAC(CXCL11), IL-8(CXCL8), IP-10(CXCL10), MCP-1(CCL2), MIG(CXCL9), MIP-1a(CCL3), MIP-

420 1b(CCL4)), growth factors (BDNF, G-CSF, GM-CSF, PDGF-BB, VEGF-A) and other factors  
421 (CD40L, Granzyme B) (Invitrogen, Carlsbad, CA). Differences in induction of proteins post  
422 stimulation were tested using both unpaired (Control-EtOH; Welch's correction) and paired (NS-  
423 Stim) t-tests. Dose-dependent responses were modeled based on g/kg/day ethanol consumed  
424 and tested for linear fit using regression analysis in Prism (GraphPad, San Diego CA).

425

#### 426 RNA isolation and library preparation:

427 Total RNA was isolated from purified AM using the mRNeasy kit (Qiagen, Valencia CA) following  
428 manufacturer instructions and quality assessed using Agilent 2100 Bioanalyzer. Libraries from  
429 PBMC RNA were generated using the TruSeq Stranded RNA LT kit (Illumina, San Diego, CA,  
430 USA). Libraries from purified CD14+ monocytes RNA were generated using the NEBnext Ultra II  
431 Directional RNA Library Prep Kit for Illumina (NEB, Ipswich, MA, USA), which allows for lower  
432 input concentrations of RNA (10ng). For both library prep kits, rRNA depleted RNA was  
433 fragmented, converted to double-stranded cDNA and ligated to adapters. The roughly 300bp-long  
434 fragments were then amplified by PCR and selected by size exclusion. Libraries were multiplexed  
435 and following quality control for size, quality, and concentrations, were sequenced to an average  
436 depth of 20 million 100bp reads on the NextSeq platform.

437

#### 438 Bulk RNA-Seq data analysis:

439 RNA-Seq reads were quality checked using FastQC  
440 (<https://www.bioinformatics.babraham.ac.uk/projects/fastqc/>), adapter and quality trimmed using  
441 TrimGalore([https://www.bioinformatics.babraham.ac.uk/projects/trim\\_galore/](https://www.bioinformatics.babraham.ac.uk/projects/trim_galore/)), retaining reads at  
442 least 35bp long. Reads were aligned to *Macaca mulatta* genome (Mmul\_8.0.1) based on  
443 annotations available on ENSEMBL (Mmul\_8.0.1.92) using TopHat (67) internally running  
444 Bowtie2 (68). Aligned reads were counted gene-wise using GenomicRanges (69), counting reads  
445 in a strand-specific manner. Genes with low read counts (average <5) and non-protein coding  
446 genes were filtered out before differential gene expression analyses. Read counts were  
447 normalized using RPKM method for generation of PCA and heatmaps. Raw counts were used to  
448 test for differentially expressed genes (DEG) using edgeR (70), defining DEG as ones with at  
449 least two-fold up or down regulation and an FDR controlled at 5%. Functional enrichment of gene  
450 expression changes in resting and LPS-stimulated cells was performed using Metascape (71).  
451 Networks of functional enrichment terms were generated using Metascape and visualized in  
452 Cytoscape (72). Transcription factors that regulate expression of DEG were predicted using the  
453 ChEA3 (39) tool using ENSEMBL ChIP database.

454

455 10X 3' scRNA-Seq

456 Freshly thawed BAL from control (n=3) and EtOH (n=3) animals were stained with anti-CD14  
457 antibody and sorted for live monocytes/macrophages using FSC/SSC parameters and CD14+  
458 cells on a BD FACSAria Fusion. Sorted AM/monocytes were pooled and resuspended at a  
459 concentration of 1,200 cells/ul and loaded into the 10X Chromium gem aiming for an estimated  
460 10,000 cells per sample. cDNA amplification and library preparation (10X v3.1 chemistry) were  
461 performed according to manufacturer protocol and sequenced on a NovaSeq S4 (Illumina) to a  
462 depth of >30,000 reads/cell.

463

464 scRNA-Seq data analysis

465 Sequencing reads were aligned to the Mmul\_8.0.1 reference genome using cellranger v3.1 (14)  
466 (10X Genomics). Quality control steps were performed prior to downstream analysis with *Seurat*  
467 (73), filtering out cells with fewer than 200 unique features and cells with greater than 20%  
468 mitochondrial content. Control and EtOH datasets were integrated in *Seurat* using the  
469 *IntegrateData* function. Data normalization and variance stabilization were performed, correcting  
470 for differential effects of mitochondrial and cell cycle gene expression levels. Clustering was  
471 performed using the first 20 principal components. Small clusters with an over-representation of  
472 B and T cell gene expression were removed for downstream analysis. Clusters were visualized  
473 using uniform manifold approximation and projection (UMAP) and further characterized into  
474 distinct AM/monocyte subsets using the *FindMarkers* function (**Supp. Table 3**).

475

476 Blood monocyte/macrophage integration

477 Seurat objects from BAL AM/monocytes were integrated with blood monocyte data from the same  
478 animals (31) using *Harmony* (74) in order to determine the level of blood monocyte infiltration into  
479 the alveolar space. Cells from the BAL that clustered more closely with blood monocytes were  
480 identified and that information was projected back onto the original UMAP.

481

482 Pseudo-temporal analysis:

483 Pseudotime trajectory of the AM/monocytes was reconstructed using Slingshot (75). The UMAP  
484 dimensional reduction performed in Seurat was used as the input for Slingshot. For calculation of  
485 the lineages and pseudotime, the blood monocyte cluster was selected as the start. Temporally  
486 expressed genes were identified by ranking all genes by their variance across pseudotime and  
487 then further fit using GAM with pseudotime as an independent variable.



488

489 Differential expression analyses:

490 Differential expression analysis (EtOH relative to Control) was performed using MAST under  
491 default settings in *Seurat*. Only statistically significant genes (Fold change cutoff  $\geq 1.2$ ; adjusted  
492 p-value  $\leq 0.05$ ) were included in downstream analysis.

493

494 Module Scoring and functional enrichment:

495 For gene scoring analysis, we compared gene signatures and pathways from KEGG  
496 (<https://www.genome.jp/kegg/pathway.html>) (**Supp. Table 4**) in the AM/monocytes using *Seurat*'s  
497 *AddModuleScore* function. Values for module scores were further exported from *Seurat* and  
498 tested for significance in Prism 7. Over representative gene ontologies were identified by  
499 enrichment of differential signatures using Metascape. All plots were generated using *ggplot2* and  
500 *Seurat*.

501

502 ATAC-Seq library preparation:

503  $10^5$  purified CD206+ alveolar macrophages were lysed in lysis buffer (10 mM Tris-HCl (pH 7.4),  
504 10 mM NaCl, 3 mM MgCl<sub>2</sub>, and NP-40 for 10 min on ice to prepare the nuclei. Immediately after  
505 lysis, nuclei were spun at 500 g for 5 min to remove the supernatant. Nuclei were then incubated  
506 with Tn5 transposase and tagmentation buffer at 37C for 30 min. Stop buffer was then added  
507 directly into the reaction to end the tagmentation. PCR was performed to amplify the library for  
508 15 cycles using the following PCR conditions: 72C for 3 min; 98C for 30s and thermocycling at  
509 98C for 15 s, 60C for 30s and 72C for 3 min; following by 72C 5 min. Libraries were then purified  
510 with AMPure (Beckman Coulter, Brea CA) beads and quantified on the Bioanalyzer (Agilent  
511 Technologies, Santa Clara CA). Libraries were multiplexed and sequenced to a depth of 50 million  
512 100bp paired reads on a NextSeq (Illumina).

513

514 ATAC-Seq data analysis:

515 Paired ended reads from sequencing were quality checked using FastQC and trimmed to a quality  
516 threshold of 20 and minimum read length 50. Trimmed reads were aligned to the Macaca Mulatta  
517 genome (Mmul\_8.0.1) using Bowtie2 (-X 2000 -k 1 --very-sensitive --no-discordant --no-mixed).  
518 Reads aligning to mitochondrial genome were removed using Samtools and PCR duplicate  
519 artifacts were removed using Picard. Samples from each group were concatenated and  
520 accessible chromatin peaks were called using Homer's *findPeaks* function (76) (FDR<0.05) and  
521 differential peak analysis was performed using Homer's *getDifferentialPeaks* function (P < 0.01).

522 Genomic annotation of open chromatin regions in monocytes and differentially accessible regions  
523 (DAR) with EtOH was assigned using ChIPSeeker (77). Promoters were defined as -1000bp to  
524 +100bp around the transcriptional start site (TSS). Functional enrichment of differentially  
525 accessible promoter regions was performed using Metascape.

526 Due to the lack of available macaque annotation databases, non-promoter regions from the  
527 macaque assembly were converted to the human genome (hg38) coordinates using the UCSC  
528 liftOver tool. *Cis*-Regulatory roles of these putative enhancer regions were identified using  
529 GREAT (<http://great.stanford.edu/public/html/>). The Washington University Genome Browser was  
530 used to visualize pile-ups (<https://epigenomegateway.wustl.edu/>). Over-representative  
531 transcription factor motifs were identified using Homer's *findMotifs* function with default  
532 parameters. A counts matrix was generated for these regions using *featureCounts* (78), where  
533 pooled bam files for each group were normalized to total numbers of mapped reads.

534

#### 535 Phagocytosis Assay

536 500,000 freshly thawed total BAL cells were resuspended in RP10 media supplemented with  
537 100ng/mL LPS and incubated for 4 hours at 37C with 5% CO<sub>2</sub>. 50uL of pHrodo Red S.aureus  
538 BioParticles (Thermo Fisher Scientific, Waltham, MA) were added to the cells and they were  
539 incubated for an additional 2 hours in the incubator. The cells were washed and stained with anti-  
540 CD206 antibody and acquired with an Attune NxT Flow Cytometer (ThermoFisher Scientific,  
541 Waltham, MA) and further analyzed using FlowJo software (Ashland, OR). Staining positive and  
542 negative controls were included for surface markers and pHrodo reagent.

543

#### 544 ROS Assay

545 500,000 freshly thawed total BAL cells were resuspended in RP10 media supplemented with  
546 100ng/mL LPS and incubated for 3 hours at 37C with 5% CO<sub>2</sub>. 250uM CellRox Deep Red Reagent  
547 (ThermoFisher, Waltham, MA) was added at the 3-hour mark and left to incubate for an additional  
548 30 min. The cells were washed and stained with anti-CD206 (BD, 19.2), anti-CD169 (Biolegend,  
549 7-239) antibodies and acquired with an Attune NxT Flow Cytometer (ThermoFisher Scientific,  
550 Waltham, MA) and further analyzed using FlowJo software (Ashland, OR). Staining positive and  
551 negative controls were included for surface markers and CellRox reagent.

552

#### 553 Mitochondria content measurement

554 500,000 freshly thawed total BAL cells were resuspended in 50 nM MitoTracker (Invitrogen) probe  
555 staining solution and incubated for 30 min at 37C with 5% CO<sub>2</sub>. The cells were washed and

556 stained with anti-CD206 (BD, 19.2), anti-CD169 (Biolegend, 7-239) antibodies and acquired with  
557 an Attune NxT Flow Cytometer (ThermoFisher Scientific, Waltham, MA) and further analyzed  
558 using FlowJo software (Ashland, OR). Staining positive and negative controls were included for  
559 surface markers and MitoTracker reagent.

560

561 Statistical Analysis:

562 All statistical analyses were conducted in Prism 7(GraphPad). Data sets were first tested for  
563 normality using Shapiro Wilk test. Two group comparisons were carried out using an unpaired t-  
564 test with Welch's correction or a paired t-test. If normal distribution was not achieved, a non-  
565 parametric Mann-Whitney test was used. Differences between 4 groups were tested using one-  
566 way ANOVA ( $\leq 0.05$ ) followed by Holm Sidak's multiple comparisons tests. Error bars for all  
567 graphs are defined as  $\pm$  SEM. Linear regression analysis compared significant shifts in curve over  
568 horizontal line, with spearman correlation coefficient or  $r^2$  reported. Statistical significance of  
569 functional enrichment was defined using hypergeometric tests. P-values less than or equal to 0.05  
570 were considered statistically significant. Values between 0.05 and 0.1 are reported as trending  
571 patterns.

572

573

574

575

576

577

578 **Author Contributions**

579 S.A.L., K.A.G., and I.M. conceived and designed the experiments. S.A.L., B.D., and A.J.  
580 performed the experiments. S.A.L. and B.D. analyzed the data. S.A.L. and I.M. wrote the paper.  
581 All authors have read and approved the final draft of the manuscript.

582

583 **Acknowledgements**

584 We are grateful to the members of the Grant laboratory for expert animal care and sample  
585 procurement. We thank Dr. Jennifer Atwood for assistance with sorting in the flow cytometry core  
586 at the Institute for Immunology, UCI. We thank Dr. Melanie Oakes from UCI Genomics and High-  
587 Throughput Facility for assistance with 10X library preparation and sequencing.

588

589 **Funding**

590 This study was supported by NIH 1R01AA028735-01 (Messaoudi), 5U01AA013510-20 (Grant),  
591 and 2R24AA019431-11 (Grant). S.A.L is supported by NIH 1F31A028704-01. The content is  
592 solely the responsibility of the authors and does not necessarily represent the official views of the  
593 NIH.

594

595 **Competing interests**

596 No competing interests reported.

597

598 **Data availability**

599 The datasets supporting the conclusions of this article are available on NCBI's Sequence Read  
600 Archive ([SRA# Pending](#)).

601

602 **FIGURES:**

Figure 1

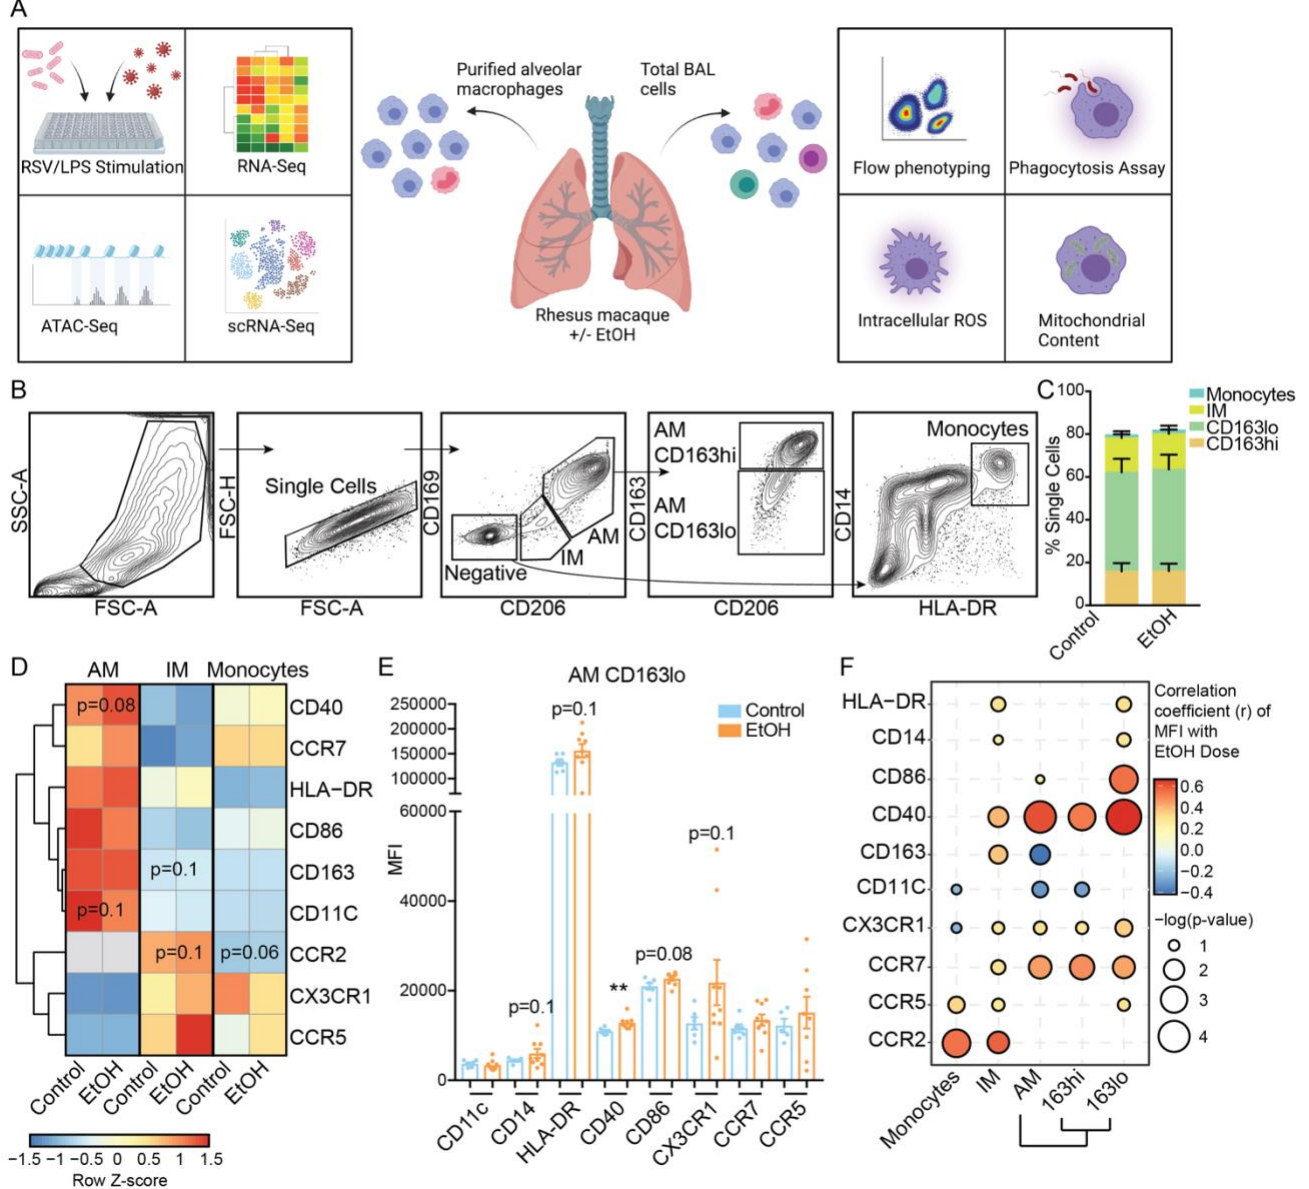

603

604 **Figure 1: EtOH exposure alters alveolar macrophage (AM) phenotype**

605 A) Experimental design of this study created with BioRender.com. B) Gating strategy to identify  
 606 monocytes, interstitial macrophages (IM), and alveolar macrophages (AM) from bronchoalveolar  
 607 lavage (BAL) samples. C) Relative distributions of the three myeloid cell subsets in the BAL. D)  
 608 Heatmap showing averaged median fluorescence intensity (MFI) values for cell surface markers  
 609 in each indicated subset/group. The scale is row Z-score where blue is lower and red higher

610 expression. E) Median fluorescence intensity (MFI) of activation and chemokine surface markers  
 611 measured from the CD163<sup>lo</sup> AM population. F) Bubble plot representing correlations between cell  
 612 surface markers and ethanol dose in the indicated cell populations. The size of each circle  
 613 represents the indicates the  $-\log_{10}$  transformed p-value significance measured by linear  
 614 regression. The color denotes the correlation coefficient (r) calculated by linear regression.  
 615 Significance for two-group comparison was calculated by t-test with Welch's correction where  
 616 trending values are shown.  
 617

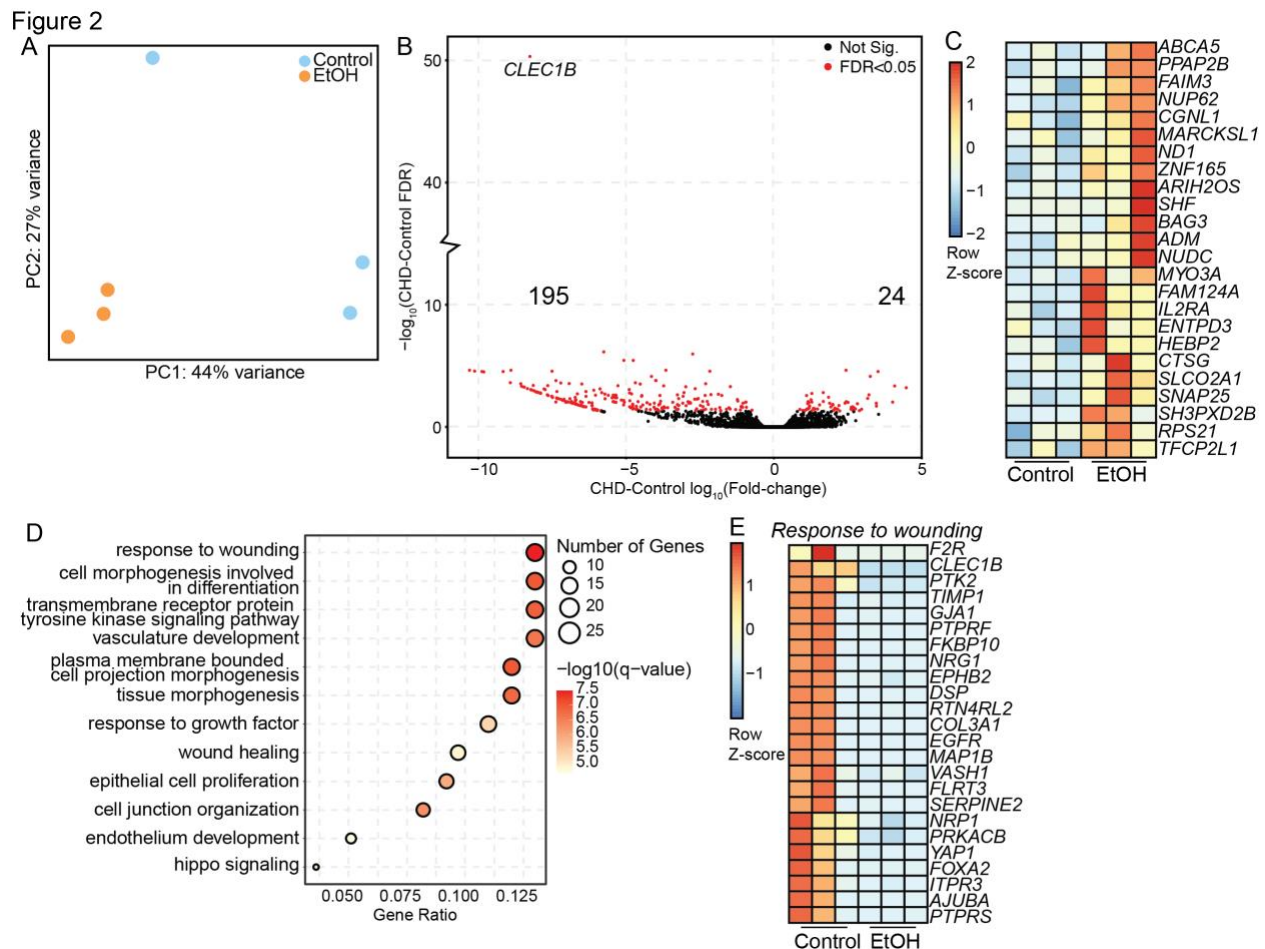

618  
 619 **Figure 2: EtOH exposure induces changes in the alveolar macrophage (AM) transcriptome**  
 620 CD206<sup>+</sup> alveolar macrophages (n=3/group) were purified from total BAL using FACS and  
 621 subjected to bulk RNA-Seq. A) Principal component analysis (PCA) of bulk RNA-Seq libraries  
 622 from controls and EtOH AM. B) Volcano plot representing the up- and downregulated differentially  
 623 expressed genes (FDR<0.05) where the X-axis is  $\log_{10}$  fold-change and the Y-axis is  $-\log_{10}$  FDR.  
 624 C) Heatmap representing the expression of DEG upregulated with EtOH where the scale is Row  
 625 Z-score representing low (blue) and high (red) expression. D) Bubble plot showing GO Biological

626 Process enrichment of downregulated DEG with EtOH. The size of the bubble represents the  
627 number of genes associated with that term, the color represents  $-\log_{10}$  q-value, and the X-axis is  
628 the ratio of genes mapping to that term to total genes. E) Heatmap representing the expression  
629 of DEG from response to wounding term where the scale is Row Z-score representing low (blue)  
630 and high (red) expression.  
631

Figure 3

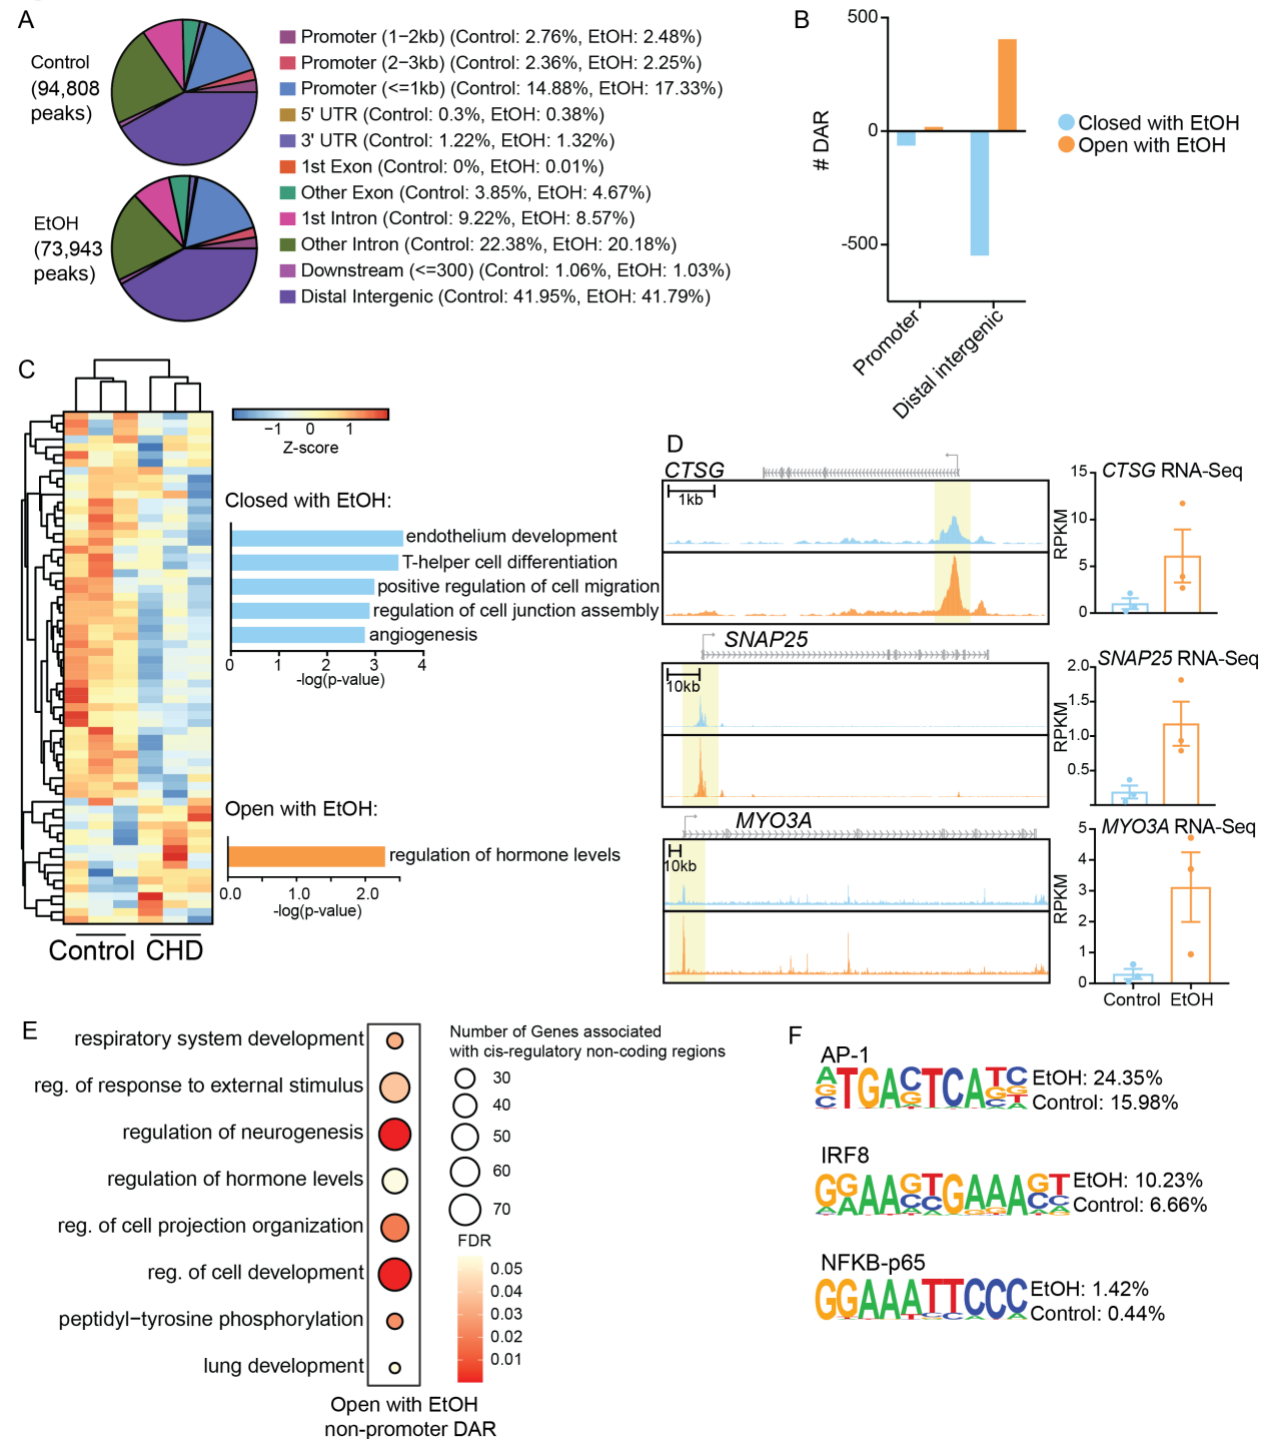

632

633 **Figure 3: Epigenomic analysis of alveolar macrophages (AM) with chronic EtOH exposure**

634 Alveolar macrophages (n=3/group) were purified from total BAL by CD206+ sort and nuclei were

635 subjected to ATAC-Seq. A) Pie charts showing genomic feature distribution of the open chromatin

636 regions (fold-change  $\geq 2$ , FDR  $\leq 0.05$ ) in control and EtOH AM. B) Bar chart showing the number

637 of open and closed differentially accessible regions (DAR) (FDR  $\leq 0.01$ ) with EtOH in promoter



638 and distal intergenic regions. C) Heatmap representing the open and closed differentially  
639 accessible promoter region counts where the scale is Row Z-score representing low (blue) and  
640 high (red) expression. Bar plots to the right represent the functional enrichment of those promoter  
641 DAR where the X-axis is  $-\log_{10}$  p-value. D) Pile-ups of selected promoter DAR more open with  
642 EtOH. Scale is indicated. To the right of each is a bar chart of the RPKM expression value of the  
643 gene from bulk RNA-Seq analysis. E) Non-promoter DAR were lifted over to the human genome  
644 and enriched for cis-regulatory mechanisms using GREAT. Bubble plot of the open non-promoter  
645 DAR enrichment where the size of the bubble represents the number of gene regions associated  
646 with that term and the color represents the FDR significance. F) Homer motif enrichment of the  
647 distal intergenic DAR. All listed motifs have significantly enriched binding sites in the open and  
648 closed non-promoter DAR where the percentage value listed is the percentage of target  
649 sequences with that motif.  
650

Figure 4

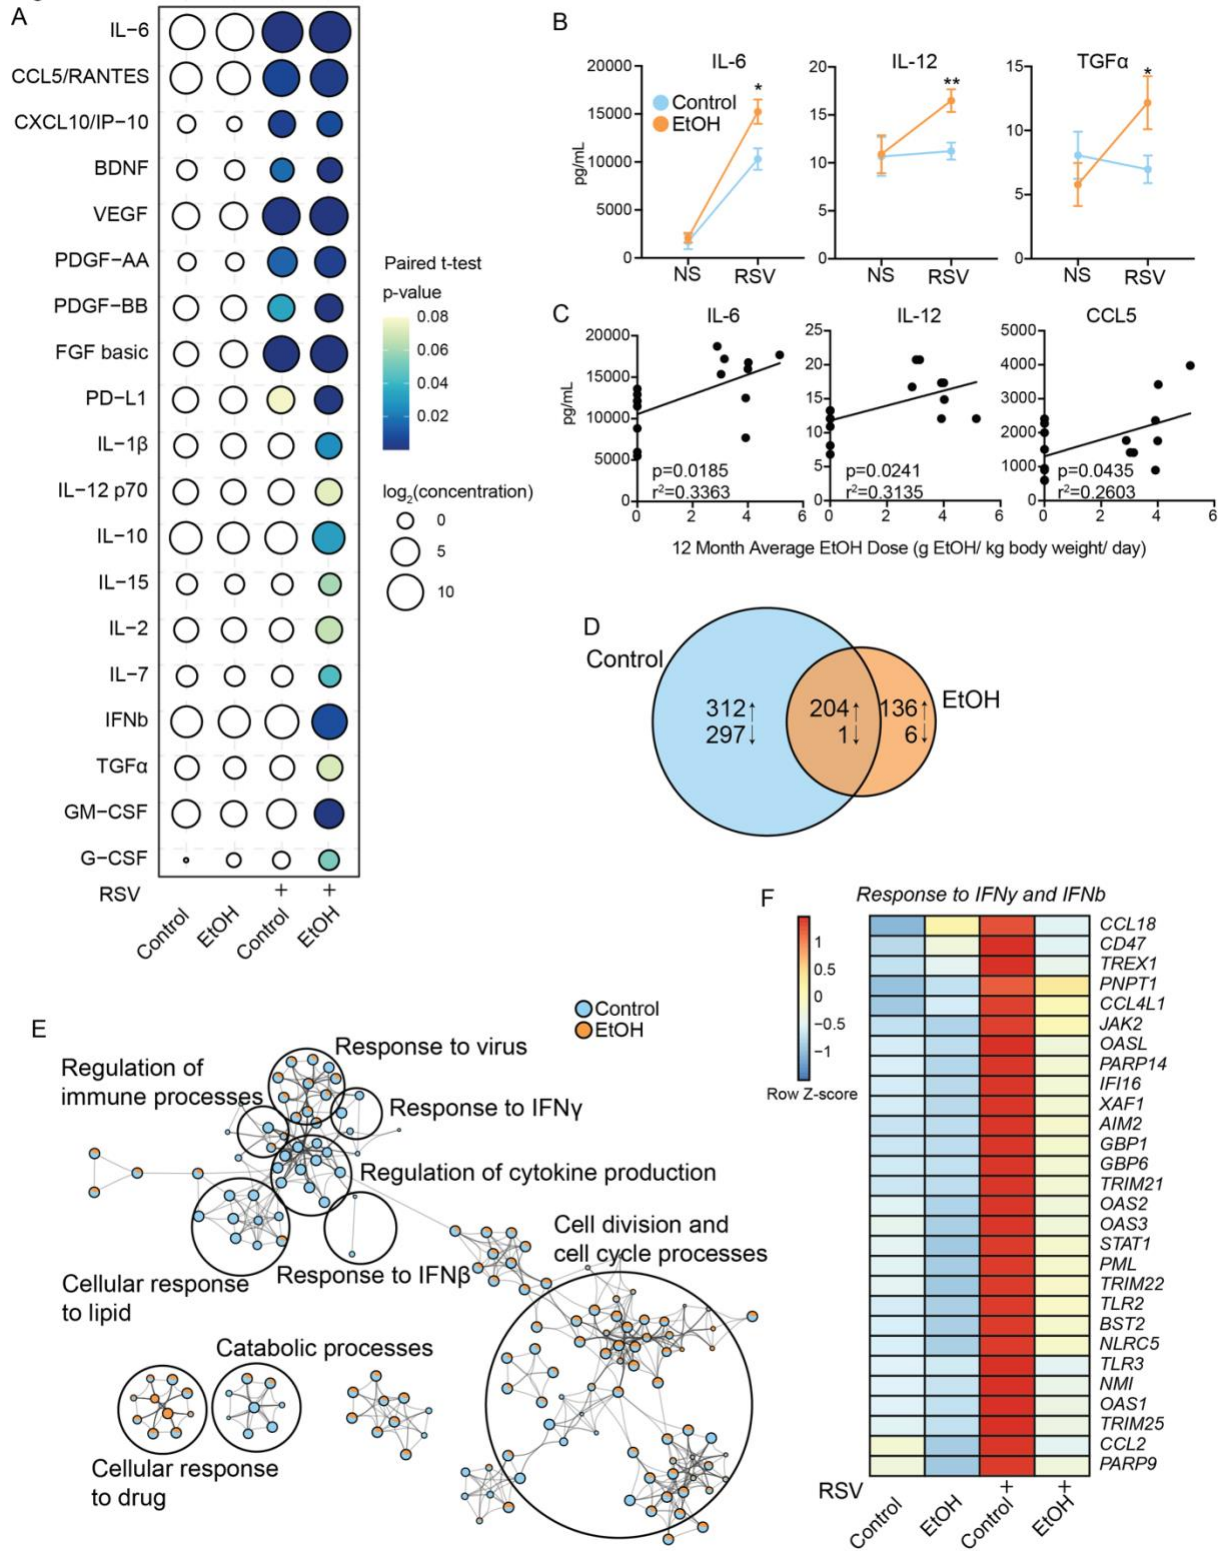

651

652

**Figure 4: EtOH-induced non-specific inflammatory response to RSV**

653 AM were purified and stimulated with RSV for 16 hours followed by Luminex analysis of mediator  
654 production and RNA-Seq. A) Bubble plot representing immune factor production (pg/ml) in the  
655 presence or absence of respiratory syncytial virus (RSV) by AM from control and EtOH animals.  
656 The size of each circle represents the indicates the  $\log_2$  average concentration of the indicated  
657 secreted factor and the color denotes the p-value significance with the darkest blue representing  
658 the most significant value. The p-values were calculated between the unstimulated and stimulated  
659 conditions for each group using paired t-test. White circles indicate uncalculated or non-significant  
660 p-value. B) Line plots representing the Luminex data for the selected analytes. Significance  
661 between groups was tested by one-way ANOVA. C) Scatter plots showing linear regression  
662 analysis of selected factor concentration with dose of ethanol (g EtOH/ kg body weight/ day). P-  
663 value and  $r^2$  values are indicated. D) Venn diagram comparing up- and downregulated DEG after  
664 RSV stimulation in control and EtOH AM. E) Cytoscape plot of functional enrichment to GO  
665 Biological Processes of upregulated DEG from both groups. The size of the dot represents the  
666 number of genes enriching to that term and the pie chart filling represents the contribution of DEG  
667 from each group. Related processes are group into the larger terms circled. F) Heatmap  
668 representing the averaged expression of DEG in each group/stimulation condition from the  
669 *Response to IFN $\gamma$*  and *Response to IFN $\beta$*  GO terms where the scale is Row Z-score representing  
670 low (blue) and high (red) expression. \*=p<0.05, \*\*=p<0.01, \*\*\*=p<0.001, \*\*\*\*=p<0.0001.  
671

Figure 5

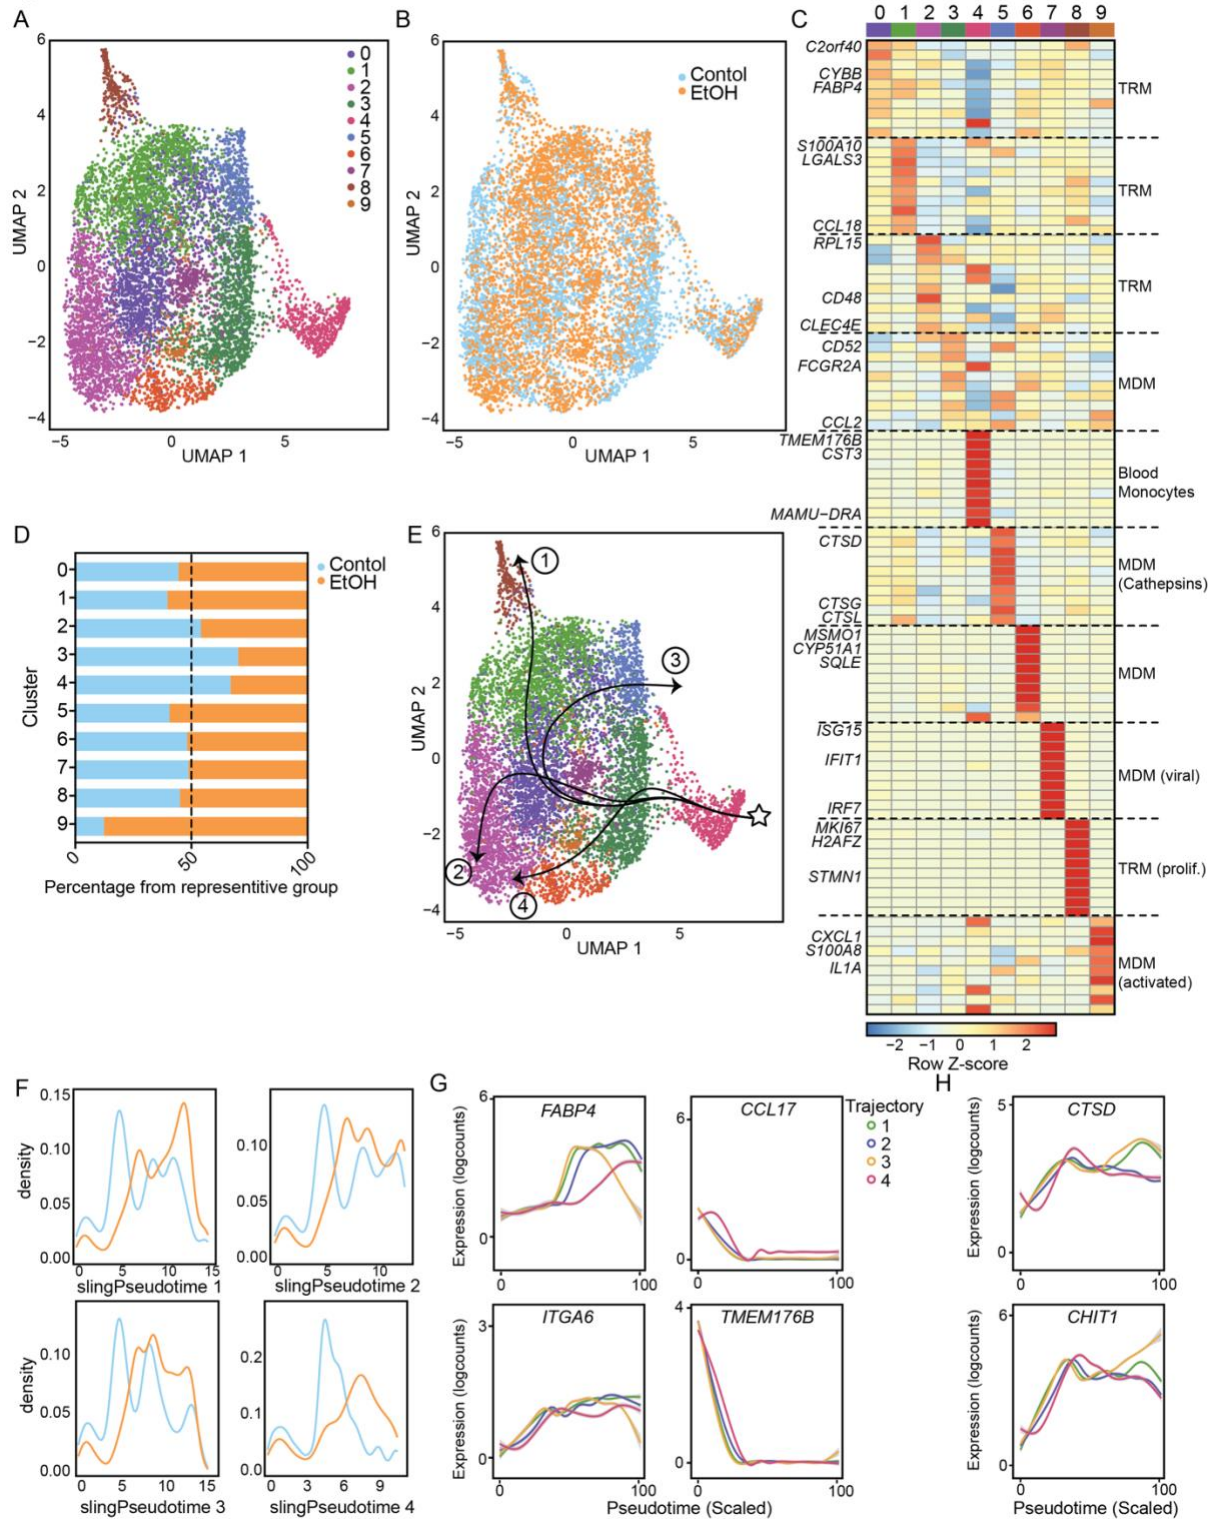

672

673

**Figure 5: scRNA-Seq profiling of alveolar macrophages after EtOH exposure**

674 Macrophages and monocytes (n=3 control/ 3 EtOH) were purified from total BAL and subjected  
 675 to 10X scRNA-Seq analysis. A,B) Visualization of total cells by uniform manifold approximation  
 676 and projection (UMAP) colored by cluster (A) and by group (B). C) Heatmap representing  
 677 averaged expression of cluster marker genes identified using the *FindMarkers* function where the  
 678 scale is Row Z-score representing low (blue) and high (red) expression. D) Relative distribution  
 679 of the cells from control (blue) or EtOH (orange) groups within each identified cluster. E) UMAP  
 680 with indicated pseudotime lineages identified by Slingshot trajectory analysis. F) Cell density plots  
 681 for Control and EtOH groups across each of four trajectory lineages determined by Slingshot.  
 682 G,H) Log expression of FABP4, ITGA6, CCL17, TMEM176B (G), CTSD, and CHIT1 (H) plotted  
 683 for each cell across the indicated scaled slingshot pseudotime trajectory (trendline shown).  
 684

Figure 6

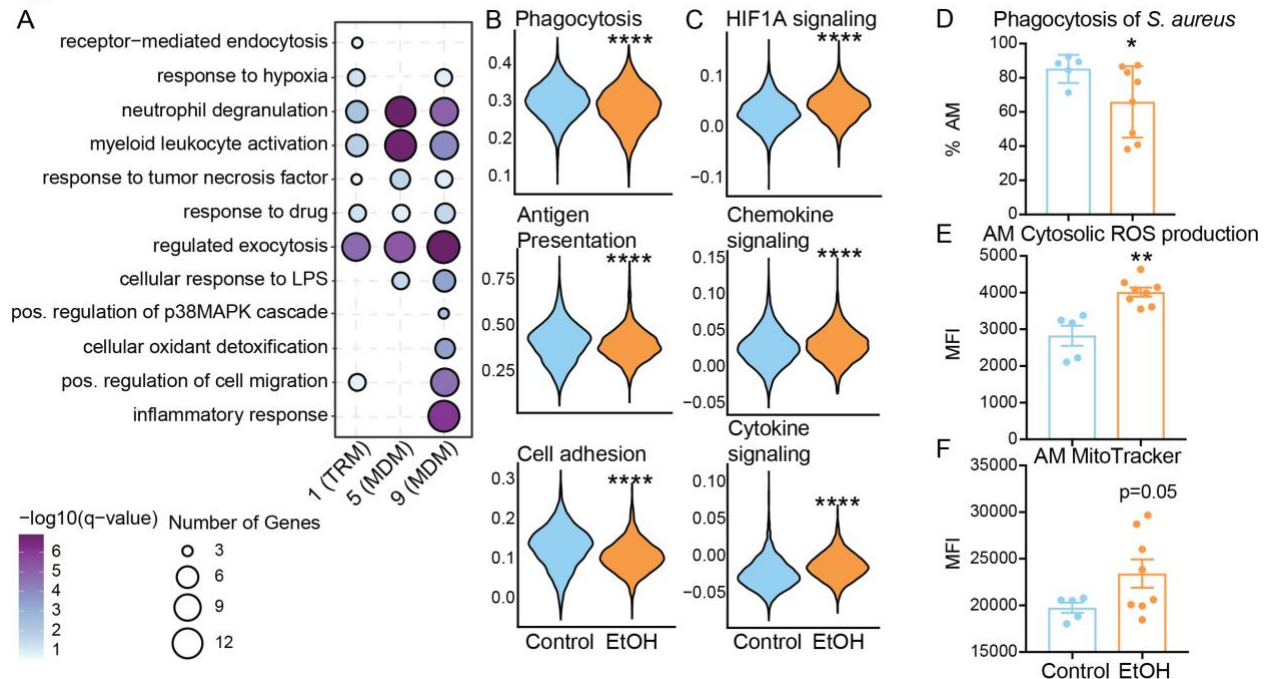

685  
 686 **Figure 6: Functional implications of EtOH exposure on alveolar macrophages (AM)**  
 687 A) Bubble plot showing functional enrichment of genes highly expressed in clusters 1, 5, and 9.  
 688 The size of the bubble represents the number of genes in that term and the color represents the  
 689  $-\log_{10}$  q-value significance. B,C) Violin plots representing module scoring of total cells from each  
 690 group. Significance was calculated using Mann-Whitney test. D) Bar plot representing percentage  
 691 of AM positive for pHrodo Red *S. aureus* particles. E) Bar plot showing median fluorescence  
 692 intensity (MFI) of intracellular oxidative stress stained by CellROX Green Reagent in AM. F) Bar  
 693 plot showing median fluorescence intensity (MFI) of intracellular mitochondria stained with  
 694 MitoTracker Red in AM. \*= $p < 0.05$ , \*\*= $p < 0.01$ , \*\*\*= $p < 0.001$ , \*\*\*\*= $p < 0.0001$ .

695  
696  
697  
698

**SUPPLEMENTARY FIGURES:**

Supp. Figure 1

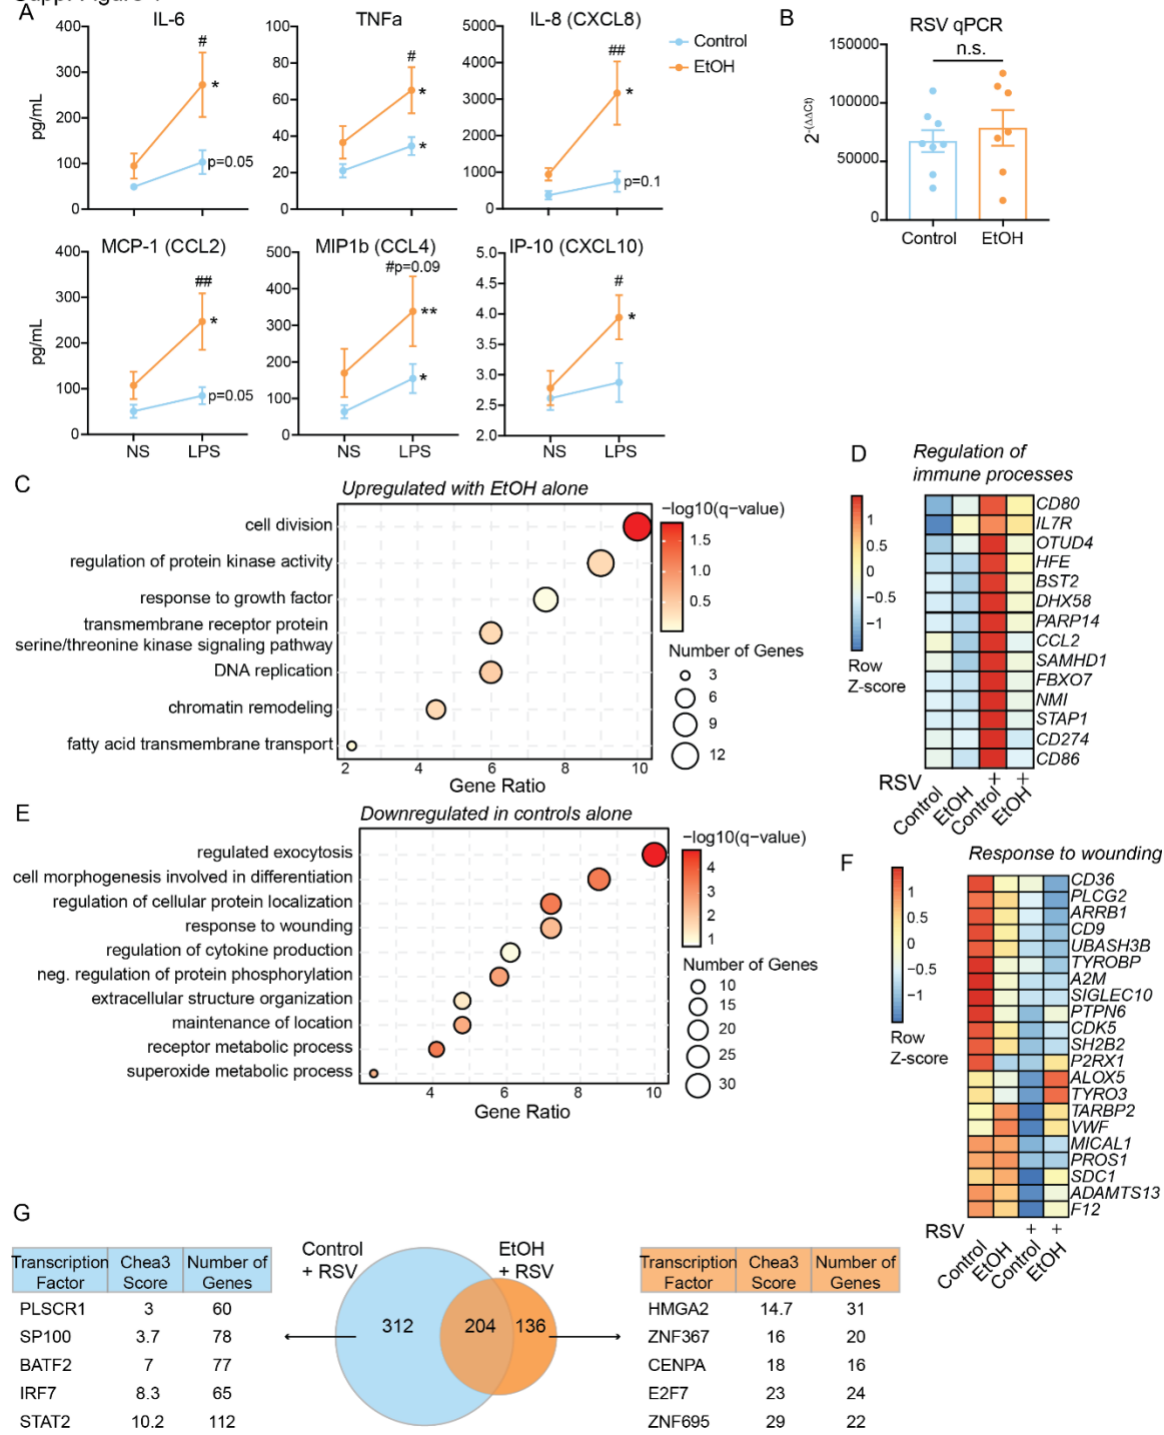

699  
700

**Supp. Figure 1: EtOH drinking induces defects in pathogen response in AM**

701 AM were purified and stimulated with LPS for 16 hours. A) Supernatants from LPS stimulation  
702 were analyzed by Luminex assay. Line plots representing the measure pg/mL values for the  
703 selected analytes. Significance between NS and LPS conditions was tested using a paired t-test  
704 and between groups was tested by one-way ANOVA. B) Bar graph of  $2^{\Delta\Delta Ct}$  values from qPCR for  
705 RSV transcripts after infection. C) Bubble plot showing GO Biological Process enrichment of  
706 upregulated DEG in EtOH group alone with RSV stimulation. The size of the bubble represents  
707 the number of genes associated with that term, the color represents  $-\log_{10}$  q-value, and the X-axis  
708 is the ratio of genes mapping to that term to total genes. D) Heatmap representing the averaged  
709 expression of DEG from *Negative regulation of immune response* term where the scale is Row Z-  
710 score representing low (blue) and high (red) expression. E) Bubble plot showing GO Biological  
711 Process enrichment of downregulated DEG in control group alone with RSV stimulation. The size  
712 of the bubble represents the number of genes associated with that term, the color represents -  
713  $\log_{10}$  q-value, and the X-axis is the ratio of genes mapping to that term to total genes. F) Heatmap  
714 representing the averaged expression of DEG from *Response to wounding* term where the scale  
715 is Row Z-score representing low (blue) and high (red) expression. G) Venn diagram comparing  
716 upregulated DEG in control and EtOH AM with RSV stimulation. Analysis of the transcription  
717 factors regulating the unique DEG was performed using the ChEA3 web browser. \*=p<0.05,  
718 \*\*=p<0.01, \*\*\*=p<0.001, \*\*\*\*=p<0.0001. Where indicated # is significance between control and  
719 EtOH groups.  
720

Supp. Figure 2

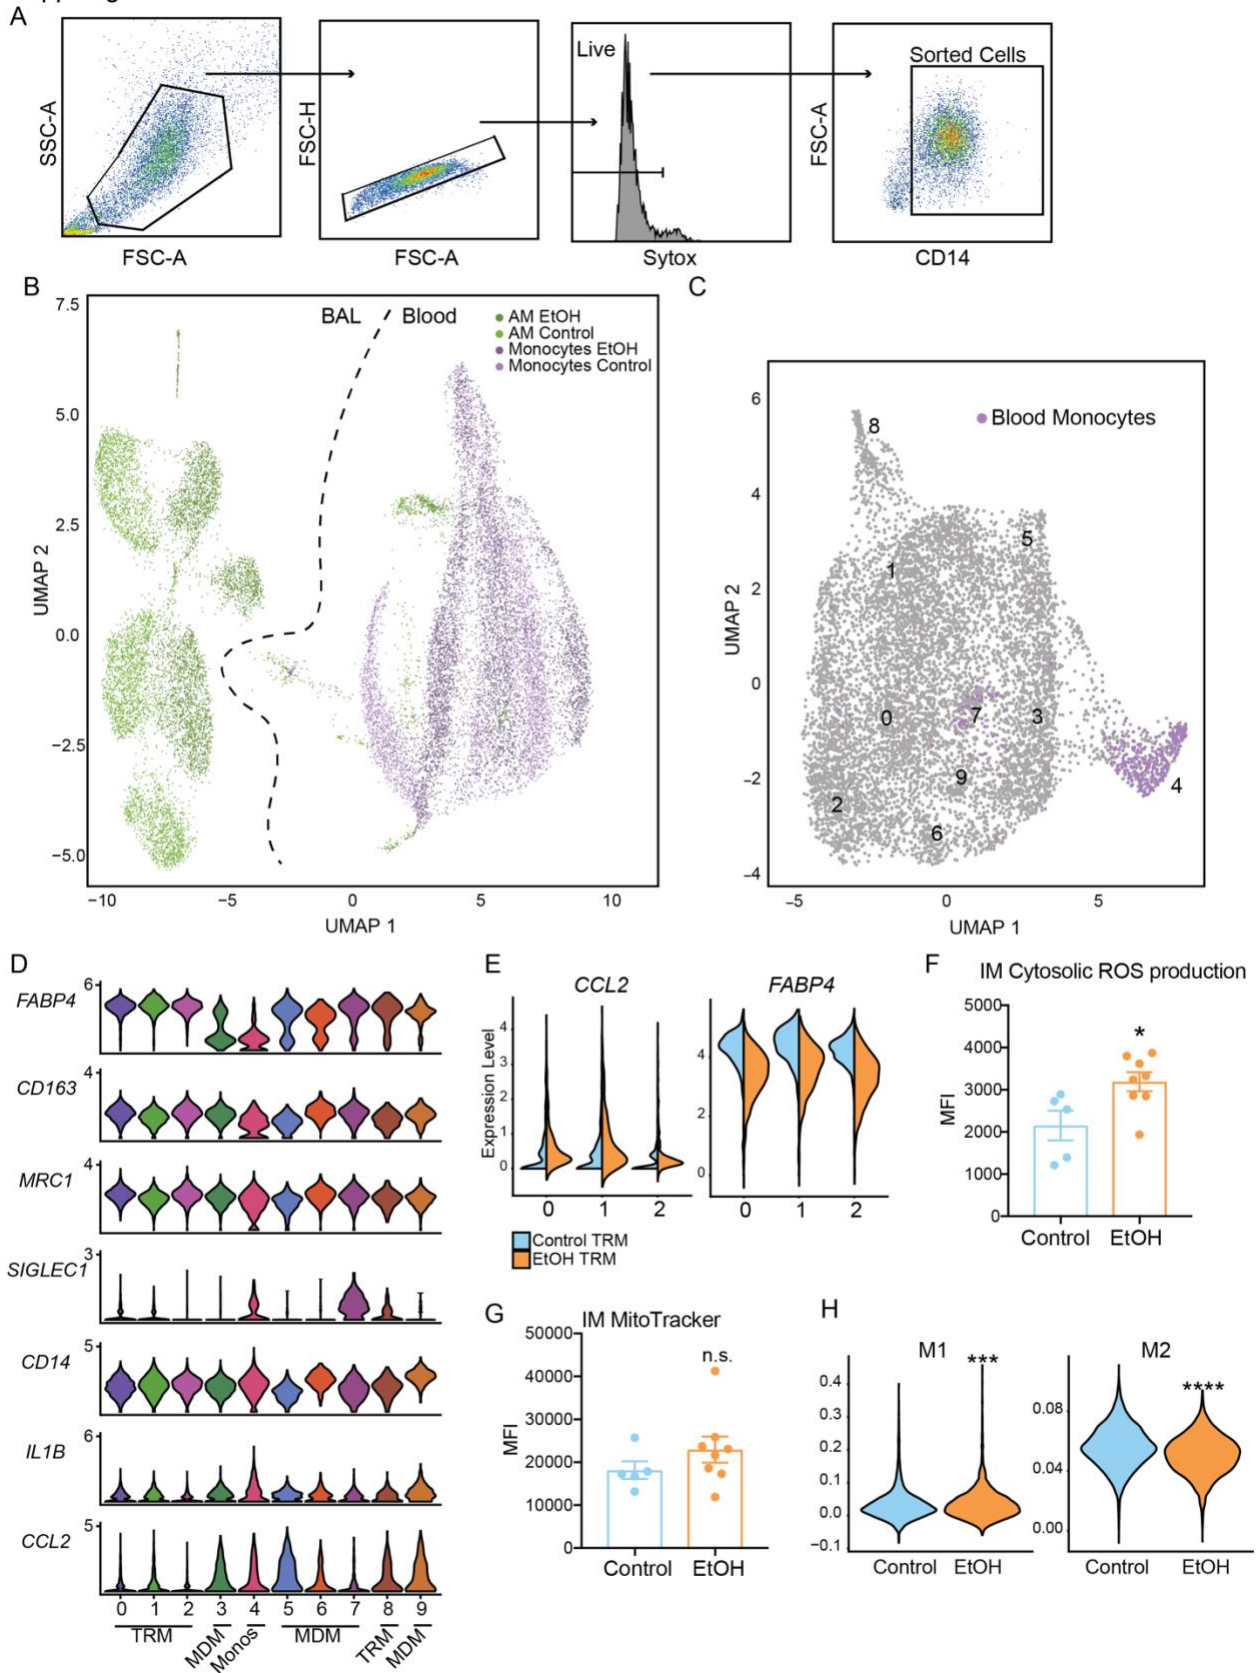



722 **Supp. Figure 2: scRNA-Seq and functional implications of EtOH drinking in AM**

723 A) Gating strategy for cell sorting for the 10X scRNA-Seq experiment. B) UMAP of integrated  
724 blood (31) and BAL analysis for identification of infiltrating monocytes in the BAL. C) Identified  
725 infiltrating blood monocytes highlighted in the original UMAP from Figure 5A. D) Violin plots of  
726 markers associated with tissue resident (*FABP4*, *CD163*, *MRC1*, *SIGLEC1*) and infiltrating  
727 (*CD14*, *IL1B*, *CCL2*) cells. E) Split violin plots of DEG detected between EtOH and control in TRM  
728 clusters. F) Bar plot showing median fluorescence intensity (MFI) of intracellular oxidative stress  
729 stained by CellROX Green Reagent in IM. G) Bar plot showing median fluorescence intensity  
730 (MFI) of intracellular mitochondria stained with MitoTracker Red in IM. H) Violin plots representing  
731 M1 and M2 module scoring of total cells from each group. Significance was calculated using  
732 Mann-Whitney test. \*= $p < 0.05$ , \*\*= $p < 0.01$ , \*\*\*= $p < 0.001$ , \*\*\*\*= $p < 0.0001$ .

733

734

735 **SUPPLEMENTARY TABLES:**

736 **Supp. Table 1:** Animals and EtOH g/kg values

737 **Supp. Table 2:** Immune mediator production by AM following LPS or RSV stimulation

738 **Supp. Table 3:** Genes associated with each cluster

739 **Supp. Table 4:** Module Scoring genes

740

741 **REFERENCES**

- 742
- 743 1. O'Keefe, J. H., Bhatti, S. K., Bajwa, A., DiNicolantonio, J. J., and Lavie, C. J. (2014)
- 744 Alcohol and cardiovascular health: the dose makes the poison...or the remedy. *Mayo*
- 745 *Clin Proc* **89**, 382-393
- 746 2. Mukamal, K. J., and Rimm, E. B. (2001) Alcohol's effects on the risk for coronary
- 747 heart disease. *Alcohol Res Health* **25**, 255-261
- 748 3. Fedirko, V., Tramacere, I., Bagnardi, V., Rota, M., Scotti, L., Islami, F., Negri, E., Straif,
- 749 K., Romieu, I., La Vecchia, C., Boffetta, P., and Jenab, M. (2011) Alcohol drinking and
- 750 colorectal cancer risk: an overall and dose-response meta-analysis of published
- 751 studies. *Ann Oncol* **22**, 1958-1972
- 752 4. Baan, R., Straif, K., Grosse, Y., Secretan, B., El Ghissassi, F., Bouvard, V., Altieri, A.,
- 753 Coglianò, V., and Group, W. H. O. I. A. f. R. o. C. M. W. (2007) Carcinogenicity of
- 754 alcoholic beverages. *Lancet Oncol* **8**, 292-293
- 755 5. Grewal, P., and Viswanathan, V. A. (2012) Liver cancer and alcohol. *Clin Liver Dis* **16**,
- 756 839-850
- 757 6. Priddy, B. M., Carmack, S. A., Thomas, L. C., Vendruscolo, J. C., Koob, G. F., and
- 758 Vendruscolo, L. F. (2017) Sex, strain, and estrous cycle influences on alcohol
- 759 drinking in rats. *Pharmacol Biochem Behav* **152**, 61-67
- 760 7. Bruha, R., Dvorak, K., and Petryl, J. (2012) Alcoholic liver disease. *World J Hepatol* **4**,
- 761 81-90
- 762 8. O'Brien, J. M., Jr., Lu, B., Ali, N. A., Levine, D. A., Abercrombie, S. K., and Lemeshow, S.
- 763 (2011) Insurance type and sepsis-associated hospitalizations and sepsis-associated
- 764 mortality among US adults: a retrospective cohort study. *Crit Care* **15**, R130
- 765 9. Mokdad, A. H., Marks, J. S., Stroup, D. F., and Gerberding, J. L. (2004) Actual causes of
- 766 death in the United States, 2000. *JAMA* **291**, 1238-1245
- 767 10. Simet, S. M., and Sisson, J. H. (2015) Alcohol's Effects on Lung Health and Immunity.
- 768 *Alcohol Res* **37**, 199-208
- 769 11. Jerrells, T. R., Pavlik, J. A., DeVasure, J., Vidlak, D., Costello, A., Strachota, J. M., and
- 770 Wyatt, T. A. (2007) Association of chronic alcohol consumption and increased
- 771 susceptibility to and pathogenic effects of pulmonary infection with respiratory
- 772 syncytial virus in mice. *Alcohol* **41**, 357-369
- 773 12. Saitz, R., Ghali, W. A., and Moskowitz, M. A. (1997) The impact of alcohol-related
- 774 diagnoses on pneumonia outcomes. *Arch Intern Med* **157**, 1446-1452
- 775 13. Samokhvalov, A. V., Irving, H. M., and Rehm, J. (2010) Alcohol consumption as a risk
- 776 factor for pneumonia: a systematic review and meta-analysis. *Epidemiol Infect* **138**,
- 777 1789-1795
- 778 14. Lujan, M., Gallego, M., Belmonte, Y., Fontanals, D., Valles, J., Lisboa, T., and Rello, J.
- 779 (2010) Influence of pneumococcal serotype group on outcome in adults with
- 780 bacteraemic pneumonia. *Eur Respir J* **36**, 1073-1079
- 781 15. Buskin, S. E., Gale, J. L., Weiss, N. S., and Nolan, C. M. (1994) Tuberculosis risk factors
- 782 in adults in King County, Washington, 1988 through 1990. *Am J Public Health* **84**,
- 783 1750-1756
- 784 16. Narasimhan, P., Wood, J., Macintyre, C. R., and Mathai, D. (2013) Risk factors for
- 785 tuberculosis. *Pulm Med* **2013**, 828939

- 786 17. Moss, M., Bucher, B., Moore, F. A., Moore, E. E., and Parsons, P. E. (1996) The role of  
787 chronic alcohol abuse in the development of acute respiratory distress syndrome in  
788 adults. *JAMA* **275**, 50-54
- 789 18. Moss, M., and Burnham, E. L. (2003) Chronic alcohol abuse, acute respiratory  
790 distress syndrome, and multiple organ dysfunction. *Crit Care Med* **31**, S207-212
- 791 19. Simou, E., Leonardi-Bee, J., and Britton, J. (2018) The Effect of Alcohol Consumption  
792 on the Risk of ARDS: A Systematic Review and Meta-Analysis. *Chest* **154**, 58-68
- 793 20. Sisson, J. H. (1995) Ethanol stimulates apparent nitric oxide-dependent ciliary beat  
794 frequency in bovine airway epithelial cells. *Am J Physiol* **268**, L596-600
- 795 21. Sisson, J. H., Pavlik, J. A., and Wyatt, T. A. (2009) Alcohol stimulates ciliary motility of  
796 isolated airway axonemes through a nitric oxide, cyclase, and cyclic nucleotide-  
797 dependent kinase mechanism. *Alcohol Clin Exp Res* **33**, 610-616
- 798 22. Wyatt, T. A., and Sisson, J. H. (2001) Chronic ethanol downregulates PKA activation  
799 and ciliary beating in bovine bronchial epithelial cells. *Am J Physiol Lung Cell Mol*  
800 *Physiol* **281**, L575-581
- 801 23. Guidot, D. M., Modelska, K., Lois, M., Jain, L., Moss, I. M., Pittet, J. F., and Brown, L. A.  
802 (2000) Ethanol ingestion via glutathione depletion impairs alveolar epithelial  
803 barrier function in rats. *Am J Physiol Lung Cell Mol Physiol* **279**, L127-135
- 804 24. Simet, S. M., Wyatt, T. A., DeVasure, J., Yanov, D., Allen-Gipson, D., and Sisson, J. H.  
805 (2012) Alcohol increases the permeability of airway epithelial tight junctions in  
806 Beas-2B and NHBE cells. *Alcohol Clin Exp Res* **36**, 432-442
- 807 25. Rubins, J. B. (2003) Alveolar macrophages: wielding the double-edged sword of  
808 inflammation. *Am J Respir Crit Care Med* **167**, 103-104
- 809 26. D'Souza, N. B., Nelson, S., Summer, W. R., and Deaciuc, I. V. (1996) Alcohol modulates  
810 alveolar macrophage tumor necrosis factor-alpha, superoxide anion, and nitric oxide  
811 secretion in the rat. *Alcohol Clin Exp Res* **20**, 156-163
- 812 27. Craig, A., Mai, J., Cai, S., and Jeyaseelan, S. (2009) Neutrophil recruitment to the lungs  
813 during bacterial pneumonia. *Infect Immun* **77**, 568-575
- 814 28. Joshi, P. C., Applewhite, L., Ritzenthaler, J. D., Roman, J., Fernandez, A. L., Eaton, D. C.,  
815 Brown, L. A., and Guidot, D. M. (2005) Chronic ethanol ingestion in rats decreases  
816 granulocyte-macrophage colony-stimulating factor receptor expression and  
817 downstream signaling in the alveolar macrophage. *J Immunol* **175**, 6837-6845
- 818 29. Liang, Y., Harris, F. L., and Brown, L. A. (2014) Alcohol induced mitochondrial  
819 oxidative stress and alveolar macrophage dysfunction. *Biomed Res Int* **2014**, 371593
- 820 30. Evren, E., Ringqvist, E., and Willinger, T. (2020) Origin and ontogeny of lung  
821 macrophages: from mice to humans. *Immunology* **160**, 126-138
- 822 31. Lewis, S. A., Sureshchandra, S., Doratt, B., Jimenez, V. A., Stull, C., Grant, K. A., and  
823 Messaoudi, I. (2021) Transcriptional, epigenetic, and functional reprogramming of  
824 blood monocytes in non-human primates following chronic alcohol drinking.  
825 *bioRxiv*, 2021.2005.2012.443856
- 826 32. Sureshchandra, S., Stull, C., Ligh, B. J. K., Nguyen, S. B., Grant, K. A., and Messaoudi, I.  
827 (2019) Chronic heavy drinking drives distinct transcriptional and epigenetic  
828 changes in splenic macrophages. *EBioMedicine* **43**, 594-606
- 829 33. Bharat, A., Bhorade, S. M., Morales-Nebreda, L., McQuattie-Pimentel, A. C., Soberanes,  
830 S., Ridge, K., DeCamp, M. M., Mestan, K. K., Perlman, H., Budinger, G. R., and Misharin,

- 831 A. V. (2016) Flow Cytometry Reveals Similarities Between Lung Macrophages in  
832 Humans and Mice. *Am J Respir Cell Mol Biol* **54**, 147-149
- 833 34. Cai, Y., Sugimoto, C., Arainga, M., Alvarez, X., Didier, E. S., and Kuroda, M. J. (2014) In  
834 vivo characterization of alveolar and interstitial lung macrophages in rhesus  
835 macaques: implications for understanding lung disease in humans. *J Immunol* **192**,  
836 2821-2829
- 837 35. Hunegnaw, R., Mushtaq, Z., Enyindah-Asonye, G., Hoang, T., and Robert-Guroff, M.  
838 (2019) Alveolar Macrophage Dysfunction and Increased PD-1 Expression During  
839 Chronic SIV Infection of Rhesus Macaques. *Front Immunol* **10**, 1537
- 840 36. Sureshchandra, S., Rais, M., Stull, C., Grant, K., and Messaoudi, I. (2016)  
841 Transcriptome Profiling Reveals Disruption of Innate Immunity in Chronic Heavy  
842 Ethanol Consuming Female Rhesus Macaques. *PLoS One* **11**, e0159295
- 843 37. Makita, N., Hizukuri, Y., Yamashiro, K., Murakawa, M., and Hayashi, Y. (2014) IL-10  
844 enhances the phenotype of M2 macrophages induced by IL-4 and confers the ability  
845 to increase eosinophil migration. *International Immunology* **27**, 131-141
- 846 38. Szabo, G., and Saha, B. (2015) Alcohol's Effect on Host Defense. *Alcohol Res* **37**, 159-  
847 170
- 848 39. Keenan, A. B., Torre, D., Lachmann, A., Leong, A. K., Wojciechowicz, M. L., Utti, V.,  
849 Jagodnik, K. M., Kropiwnicki, E., Wang, Z., and Ma'ayan, A. (2019) ChEA3:  
850 transcription factor enrichment analysis by orthogonal omics integration. *Nucleic  
851 Acids Res* **47**, W212-W224
- 852 40. Ramond, E., Jamet, A., Coureuil, M., and Charbit, A. (2019) Pivotal Role of  
853 Mitochondria in Macrophage Response to Bacterial Pathogens. *Frontiers in  
854 Immunology* **10**
- 855 41. Xue, J., Schmidt, S. V., Sander, J., Draffehn, A., Krebs, W., Quester, I., De Nardo, D.,  
856 Gohel, T. D., Emde, M., Schmidleithner, L., Ganesan, H., Nino-Castro, A., Mallmann, M.  
857 R., Labzin, L., Theis, H., Kraut, M., Beyer, M., Latz, E., Freeman, T. C., Ulas, T., and  
858 Schultze, J. L. (2014) Transcriptome-based network analysis reveals a spectrum  
859 model of human macrophage activation. *Immunity* **40**, 274-288
- 860 42. Baharom, F., Rankin, G., Blomberg, A., and Smed-Sorensen, A. (2017) Human Lung  
861 Mononuclear Phagocytes in Health and Disease. *Front Immunol* **8**, 499
- 862 43. Karavitis, J., and Kovacs, E. J. (2011) Macrophage phagocytosis: effects of  
863 environmental pollutants, alcohol, cigarette smoke, and other external factors. *J  
864 Leukoc Biol* **90**, 1065-1078
- 865 44. Patel, S., Homaei, A., El-Seedi, H. R., and Akhtar, N. (2018) Cathepsins: Proteases that  
866 are vital for survival but can also be fatal. *Biomed Pharmacother* **105**, 526-532
- 867 45. Burnham, E. L., Kovacs, E. J., and Davis, C. S. (2013) Pulmonary cytokine composition  
868 differs in the setting of alcohol use disorders and cigarette smoking. *Am J Physiol  
869 Lung Cell Mol Physiol* **304**, L873-882
- 870 46. O'Halloran, E. B., Curtis, B. J., Afshar, M., Chen, M. M., Kovacs, E. J., and Burnham, E. L.  
871 (2016) Alveolar macrophage inflammatory mediator expression is elevated in the  
872 setting of alcohol use disorders. *Alcohol* **50**, 43-50
- 873 47. Evans, B. J., Haskard, D. O., Sempowski, G., and Landis, R. C. (2013) Evolution of the  
874 Macrophage CD163 Phenotype and Cytokine Profiles in a Human Model of Resolving  
875 Inflammation. *Int J Inflam* **2013**, 780502

- 876 48. Kwiecień, I., Polubiec-Kownacka, M., Dziedzic, D., Wołosz, D., Rzepecki, P., and  
877 Domagała-Kulawik, J. (2019) CD163 and CCR7 as markers for macrophage  
878 polarization in lung cancer microenvironment. *Cent Eur J Immunol* **44**, 395-402
- 879 49. Xiong, Z., Leme, A. S., Ray, P., Shapiro, S. D., and Lee, J. S. (2011) CX3CR1+ lung  
880 mononuclear phagocytes spatially confined to the interstitium produce TNF-alpha  
881 and IL-6 and promote cigarette smoke-induced emphysema. *J Immunol* **186**, 3206-  
882 3214
- 883 50. Aran, D., Looney, A. P., Liu, L., Wu, E., Fong, V., Hsu, A., Chak, S., Naikawadi, R. P.,  
884 Wolters, P. J., Abate, A. R., Butte, A. J., and Bhattacharya, M. (2019) Reference-based  
885 analysis of lung single-cell sequencing reveals a transitional profibrotic macrophage.  
886 *Nat Immunol* **20**, 163-172
- 887 51. Allard, B., Panariti, A., and Martin, J. G. (2018) Alveolar Macrophages in the  
888 Resolution of Inflammation, Tissue Repair, and Tolerance to Infection. *Front*  
889 *Immunol* **9**, 1777
- 890 52. Jung, M. K., Callaci, J. J., Lauing, K. L., Otis, J. S., Radek, K. A., Jones, M. K., and Kovacs, E.  
891 J. (2011) Alcohol exposure and mechanisms of tissue injury and repair. *Alcohol Clin*  
892 *Exp Res* **35**, 392-399
- 893 53. Chen, S., Yang, J., Wei, Y., and Wei, X. (2020) Epigenetic regulation of macrophages:  
894 from homeostasis maintenance to host defense. *Cell Mol Immunol* **17**, 36-49
- 895 54. Saeed, S., Quintin, J., Kerstens, H. H., Rao, N. A., Aghajani-refah, A., Matarese, F., Cheng,  
896 S. C., Ratter, J., Berentsen, K., van der Ent, M. A., Sharifi, N., Janssen-Megens, E. M., Ter  
897 Huurne, M., Mandoli, A., van Schaik, T., Ng, A., Burden, F., Downes, K., Frontini, M.,  
898 Kumar, V., Giamarellos-Bourboulis, E. J., Ouwehand, W. H., van der Meer, J. W.,  
899 Joosten, L. A., Wijmenga, C., Martens, J. H., Xavier, R. J., Logie, C., Netea, M. G., and  
900 Stunnenberg, H. G. (2014) Epigenetic programming of monocyte-to-macrophage  
901 differentiation and trained innate immunity. *Science* **345**, 1251086
- 902 55. Karavitis, J., Murdoch, E. L., Deburghraeve, C., Ramirez, L., and Kovacs, E. J. (2012)  
903 Ethanol suppresses phagosomal adhesion maturation, Rac activation, and  
904 subsequent actin polymerization during FcγR-mediated phagocytosis. *Cell*  
905 *Immunol* **274**, 61-71
- 906 56. Yeligar, S. M., Harris, F. L., Hart, C. M., and Brown, L. A. (2012) Ethanol induces  
907 oxidative stress in alveolar macrophages via upregulation of NADPH oxidases. *J*  
908 *Immunol* **188**, 3648-3657
- 909 57. Yeligar, S. M., Harris, F. L., Hart, C. M., and Brown, L. A. (2014) Glutathione attenuates  
910 ethanol-induced alveolar macrophage oxidative stress and dysfunction by  
911 downregulating NADPH oxidases. *Am J Physiol Lung Cell Mol Physiol* **306**, L429-441
- 912 58. Yeligar, S. M., Mehta, A. J., Harris, F. L., Brown, L. A., and Hart, C. M. (2016)  
913 Peroxisome Proliferator-Activated Receptor gamma Regulates Chronic Alcohol-  
914 Induced Alveolar Macrophage Dysfunction. *Am J Respir Cell Mol Biol* **55**, 35-46
- 915 59. Zakhari, S. (2013) Alcohol metabolism and epigenetics changes. *Alcohol Res* **35**, 6-16
- 916 60. Das, S. K., and Vasudevan, D. M. (2007) Alcohol-induced oxidative stress. *Life Sci* **81**,  
917 177-187
- 918 61. Harijith, A., Ebenezer, D. L., and Natarajan, V. (2014) Reactive oxygen species at the  
919 crossroads of inflammasome and inflammation. *Front Physiol* **5**, 352

- 920 62. Hatinguais, R., Pradhan, A., Brown, G. D., Brown, A. J. P., Warris, A., and Shekhova, E.  
921 (2021) Mitochondrial Reactive Oxygen Species Regulate Immune Responses of  
922 Macrophages to *Aspergillus fumigatus*. *Front Immunol* **12**, 641495
- 923 63. Morris, N. L., Harris, F. L., Brown, L. A. S., and Yeligar, S. M. (2021) Alcohol induces  
924 mitochondrial derangements in alveolar macrophages by upregulating NADPH  
925 oxidase 4. *Alcohol* **90**, 27-38
- 926 64. Baker, E. J., Farro, J., Gonzales, S., Helms, C., and Grant, K. A. (2014) Chronic alcohol  
927 self-administration in monkeys shows long-term quantity/frequency categorical  
928 stability. *Alcohol Clin Exp Res* **38**, 2835-2843
- 929 65. Grant, K. A., Leng, X., Green, H. L., Szeliga, K. T., Rogers, L. S., and Gonzales, S. W.  
930 (2008) Drinking typography established by scheduled induction predicts chronic  
931 heavy drinking in a monkey model of ethanol self-administration. *Alcohol Clin Exp*  
932 *Res* **32**, 1824-1838
- 933 66. Jimenez, V. A., Helms, C. M., Cornea, A., Meshul, C. K., and Grant, K. A. (2015) An  
934 ultrastructural analysis of the effects of ethanol self-administration on the  
935 hypothalamic paraventricular nucleus in rhesus macaques. *Front Cell Neurosci* **9**,  
936 260
- 937 67. Trapnell, C., Pachter, L., and Salzberg, S. L. (2009) TopHat: discovering splice  
938 junctions with RNA-Seq. *Bioinformatics* **25**, 1105-1111
- 939 68. Langmead, B., and Salzberg, S. L. (2012) Fast gapped-read alignment with Bowtie 2.  
940 *Nat Methods* **9**, 357-359
- 941 69. Lawrence, M., Huber, W., Pages, H., Aboyoun, P., Carlson, M., Gentleman, R., Morgan,  
942 M. T., and Carey, V. J. (2013) Software for computing and annotating genomic  
943 ranges. *PLoS Comput Biol* **9**, e1003118
- 944 70. Robinson, M. D., McCarthy, D. J., and Smyth, G. K. (2010) edgeR: a Bioconductor  
945 package for differential expression analysis of digital gene expression data.  
946 *Bioinformatics* **26**, 139-140
- 947 71. Zhou, Y., Zhou, B., Pache, L., Chang, M., Khodabakhshi, A. H., Tanaseichuk, O., Benner,  
948 C., and Chanda, S. K. (2019) Metascape provides a biologist-oriented resource for the  
949 analysis of systems-level datasets. *Nat Commun* **10**, 1523
- 950 72. Shannon, P., Markiel, A., Ozier, O., Baliga, N. S., Wang, J. T., Ramage, D., Amin, N.,  
951 Schwikowski, B., and Ideker, T. (2003) Cytoscape: a software environment for  
952 integrated models of biomolecular interaction networks. *Genome Res* **13**, 2498-2504
- 953 73. Stuart, T., Butler, A., Hoffman, P., Hafemeister, C., Papalexi, E., Mauck, W. M., 3rd, Hao,  
954 Y., Stoeckius, M., Smibert, P., and Satija, R. (2019) Comprehensive Integration of  
955 Single-Cell Data. *Cell* **177**, 1888-1902 e1821
- 956 74. Korsunsky, I., Millard, N., Fan, J., Slowikowski, K., Zhang, F., Wei, K., Baglaenko, Y.,  
957 Brenner, M., Loh, P. R., and Raychaudhuri, S. (2019) Fast, sensitive and accurate  
958 integration of single-cell data with Harmony. *Nat Methods* **16**, 1289-1296
- 959 75. Street, K., Risso, D., Fletcher, R. B., Das, D., Ngai, J., Yosef, N., Purdom, E., and Dudoit,  
960 S. (2018) Slingshot: cell lineage and pseudotime inference for single-cell  
961 transcriptomics. *BMC Genomics* **19**, 477
- 962 76. Heinz, S., Benner, C., Spann, N., Bertolino, E., Lin, Y. C., Laslo, P., Cheng, J. X., Murre, C.,  
963 Singh, H., and Glass, C. K. (2010) Simple combinations of lineage-determining  
964 transcription factors prime cis-regulatory elements required for macrophage and B  
965 cell identities. *Mol Cell* **38**, 576-589

- 966 77. Yu, G., Wang, L. G., and He, Q. Y. (2015) ChIPseeker: an R/Bioconductor package for  
967 ChIP peak annotation, comparison and visualization. *Bioinformatics* **31**, 2382-2383  
968 78. Liao, Y., Smyth, G. K., and Shi, W. (2014) featureCounts: an efficient general purpose  
969 program for assigning sequence reads to genomic features. *Bioinformatics* **30**, 923-  
970 930  
971
